# Supplementary material
Source: publisher figshare collection journal article supplement (https://plos.figshare.com/articles/dataset/_/6271976)
Supplement: Supplementary file 1 [file 1]

Archive with 22 entries (22 files):
- pgen.1007395.s001.pdf
- pgen.1007395.s002.pdf
- pgen.1007395.s003.pdf
- pgen.1007395.s004.pdf
- pgen.1007395.s005.pdf
- pgen.1007395.s006.pdf
- pgen.1007395.s007.pdf
- pgen.1007395.s008.pdf
- pgen.1007395.s009.pdf
- pgen.1007395.s010.pdf
- pgen.1007395.s011.pdf
- pgen.1007395.s012.pdf
- pgen.1007395.s013.pdf
- pgen.1007395.s014.pdf
- pgen.1007395.s015.pdf
- pgen.1007395.s016.pdf
- pgen.1007395.s017.pdf
- pgen.1007395.s018.doc
- pgen.1007395.s019.doc
- pgen.1007395.s020.doc
- pgen.1007395.s021.doc
- pgen.1007395.s022.doc
