# Supplementary material
Source: publisher figshare collection journal article supplement (https://plos.figshare.com/articles/dataset/_/6271976)
Supplement: Supplementary file 1 [file 1 › pgen.1007395.s003.pdf]

## BBL11121

|     | ACC1        | ACC4        | Brain       | Colon       | Liver       | Ovary       | Skin        | Breast      |
|-----|-------------|-------------|-------------|-------------|-------------|-------------|-------------|-------------|
| Z9  | 5.31e-09    | 5.89e-09    | 6.81e-09    | 8.91e-09    | 8.23e-09    | 7.99e-09    | 5.34e-09    | 0.04425147  |
| Z8  | 9.18e-09    | 0.00076585  | 0.02454665  | 0.01253476  | 0.005435416 | 0.002307914 | 0.000378954 | 0.00117892  |
| Z78 | 8.64e-09    | 9.06e-09    | 5.28e-09    | 6.88e-09    | 8.48e-09    | 7.4e-09     | 5.06e-09    | 0.02694728  |
| Z76 | 0.000110433 | 0.001314369 | 0.001355219 | 4.97e-09    | 0.04762595  | 6.8e-09     | 0.000498471 | 5.93e-09    |
| Z74 | 8.47e-09    | 9.78e-09    | 0.000712677 | 8.39e-09    | 9.7e-09     | 8.79e-09    | 5.33e-09    | 0.03222274  |
| Z73 | 7.88e-09    | 0.000694599 | 0.00193194  | 0.08343905  | 0.09812867  | 0.02918188  | 0.06444704  | 0.04610206  |
| Z72 | 5.47e-09    | 0.001200575 | 5.56e-09    | 0.001098191 | 4.97e-09    | 0.0006641   | 0.003444153 | 0.07088798  |
| Z71 | 0.000185045 | 8.83e-09    | 0.04020129  | 0.01728956  | 0.000955942 | 0.00077007  | 0.03653212  | 0.001769727 |
| Z70 | 6.52e-09    | 9.51e-09    | 0.01481158  | 0.009802654 | 0.01072009  | 0.001392644 | 0.005538754 | 0.07065227  |
| Z7  | 5.08e-09    | 6.25e-09    | 0.5092676   | 0.4920981   | 0.5107622   | 0.4947831   | 0.5170471   | 0.469401    |
| Z69 | 5.54e-09    | 8.74e-09    | 5.14e-09    | 8.42e-09    | 8.95e-09    | 8.86e-09    | 0.000924913 | 0.04755897  |
| Z68 | 0.000507253 | 9.59e-09    | 0.02786259  | 0.00925325  | 0.02920058  | 0.003940389 | 0.0118075   | 0.07842942  |
| Z67 | 6.67e-09    | 0.00032777  | 0.02255247  | 0.03846511  | 0.02408136  | 0.05256102  | 0.005158528 | 0.001657831 |
| Z66 | 8.07e-09    | 5.82e-09    | 6.68e-05    | 7.89e-09    | 5.55e-09    | 0.000601487 | 2.44e-05    | 0.03989984  |
| Z65 | 0.001601292 | 0.001833158 | 7.59e-09    | 8.04e-09    | 5.13e-09    | 0.000612802 | 6.23e-09    | 0.02850085  |
| Z64 | 8.53e-09    | 7.18e-09    | 7.98e-09    | 8.52e-09    | 8.93e-09    | 9.69e-09    | 7.7e-09     | 0.04676129  |
| Z63 | 9.56e-09    | 6.25e-09    | 7.5e-09     | 7.53e-09    | 6.94e-09    | 7.32e-09    | 0.03711182  | 9.22e-09    |
| Z62 | 0.001278253 | 0.001558048 | 0.000781092 | 0.001285331 | 0.000858217 | 0.001202491 | 0.000735767 | 0.05466444  |
| Z61 | 7.79e-09    | 5.43e-09    | 0.8092365   | 0.5491088   | 0.6585065   | 0.5356372   | 0.5070571   | 0.6229188   |
| Z60 | 6.93e-09    | 9.63e-09    | 5.24e-09    | 6.29e-09    | 7.38e-09    | 7.5e-09     | 7.18e-09    | 0.04263566  |
| Z6  | 5.65e-09    | 8.54e-09    |             | 0.4898936   | 0.53703     | 0.4689024   | 0.4840298   | 0.4679429   |
| Z57 | 8.86e-09    | 9.59e-09    | 0.000948309 | 0.000761086 | 0.000679254 | 8.19e-09    | 9.05e-09    | 0.04782013  |
| Z56 | 5.23e-09    | 5.78e-09    | 6.07e-09    | 7.42e-09    | 9.09e-09    | 8.91e-09    | 9.52e-09    | 0.02534681  |
| Z55 | 7.34e-09    | 0.000171664 | 0.02459642  | 0.01601398  | 8.3e-09     | 8.32e-09    | 0.04245279  | 0.000248866 |
| Z54 | 0.001740136 | 0.000754382 | 0.003184083 | 0.001269063 | 0.001704766 | 0.000871608 | 0.000976676 | 0.06719226  |
| Z52 | 6.99e-09    | 8.94e-09    | 8.03e-09    | 0.000447804 | 0.004867886 | 0.001966583 | 7.74e-09    | 9.83e-09    |
| Z51 | 6.26e-09    | 0.001826998 | 0.05089798  | 0.00682926  | 6.2e-09     | 5.16e-05    | 9.52e-06    | 0.000794731 |
| Z50 | 5.5e-09     | 7.55e-09    | 8.62e-09    | 0.04248136  | 0.01067703  | 0.003385023 | 0.02021487  | 0.003932568 |
| Z5  | 0.000990359 | 5.15e-09    | 0.09744565  | 0.07207137  | 0.04382948  | 0.06116235  | 0.1393117   | 0.07893503  |
| Z49 | 8.64e-09    | 0.000177645 | 8.05e-09    | 0.043585    | 0.03616943  | 0.008058981 | 0.0136591   | 0.05469268  |
| Z48 | 6.8e-09     | 8.08e-09    | 7.77e-09    | 9.08e-09    | 9.64e-09    | 8.73e-09    | 0.000376017 | 0.04903432  |
| Z47 | 0.000729001 | 9.08e-09    | 0.008477413 | 0.04375746  | 0.05555658  | 0.03968605  | 0.07733101  | 0.06833441  |
| Z46 | 0.000910903 | 5.59e-05    | 0.07815523  | 0.000584669 | 0.02689994  | 9.33e-09    | 0.02112059  | 0.00342789  |
| Z45 | 0.001183073 | 0.001006303 | 0.5939843   | 0.4832791   | 0.4647367   | 0.4960188   | 0.4990415   | 0.4975614   |
| Z44 | 7.49e-09    | 8.45e-09    | 8.07e-09    | 7.39e-09    |             | 7.14e-09    | 6.23e-09    | 8.75e-09    |
| Z43 | 8.24e-09    | 0.000482301 | 0.02792901  | 0.07322616  | 0.07761223  | 0.02451701  | 0.0547689   | 0.04275368  |
| Z42 | 0.000933342 | 0.001347479 | 0.000948297 | 7.86e-09    | 8.23e-09    | 0.000704623 | 9.42e-09    | 0.03300376  |
| Z41 |             |             |             | 6.83e-09    |             |             |             | 6.92e-09    |
| Z40 |             | 6.96e-09    | 7.7e-09     | 5.42e-09    | 8.87e-05    |             | 6.34e-05    | 0.02907362  |
| Z4  | 0.001263996 | 0.001612885 | 0.02160152  | 0.124268    | 0.0972827   | 0.0243573   | 0.06856437  | 0.01949012  |
| Z39 | 9.78e-09    | 8.76e-09    | 0.000480887 | 0.001721873 |             | 4.97e-09    | 5.49e-09    | 0.04692236  |
| Z38 | 0.00089315  | 6.61e-09    | 7.93e-09    | 0.000963849 | 9.15e-09    | 0.06183626  | 0.000699455 | 9.89e-09    |
| Z37 | 8.26e-06    | 7.44e-09    | 0.04130044  | 0.03606574  | 0.005982749 | 0.008873028 | 0.06016059  | 6.31e-09    |
| Z36 | 9.47e-09    | 0.001435964 | 8.6e-09     | 5.62e-09    | 0.001452064 | 9.72e-09    | 0.000734795 | 0.03845207  |
| Z35 | 8.37e-09    | 8.7e-09     | 8.14e-09    | 0.001138477 | 9.17e-09    | 8.67e-09    | 6.61e-09    | 0.05739484  |
| Z34 | 5.97e-09    | 6.71e-09    | 0.005204929 | 0.05638075  | 0.02599099  | 0.04052736  | 0.07811821  | 0.06389934  |
| Z33 | 5.34e-09    | 0.000610104 | 0.421463    | 0.3266936   | 0.2828133   | 0.373369    | 0.2727022   | 0.3584537   |
| Z32 | 0.001279822 | 0.0001633   | 6.05e-09    | 0.008490078 | 0.000559457 | 0.05614976  | 0.000198283 | 0.002277664 |
| Z31 | 0.000314587 | 5.36e-09    | 0.05785633  | 0.006189727 | 0.02233812  | 8.13e-09    | 0.01995145  | 0.001515268 |
| Z30 | 6.65e-09    | 6.11e-09    | 0.5031003   | 0.5120624   | 0.5040609   | 0.4910294   | 0.5132894   | 0.505319    |
| Z3  | 0.001446152 | 0.002403062 | 0.001051148 | 0.001714779 | 8.31e-09    | 0.001067852 | 5.81e-09    | 0.05072489  |
| Z29 | 0.002354657 | 2.74e-05    | 0.008343776 | 0.02948989  | 0.007965989 | 0.02991993  | 0.04674878  | 0.009654385 |
| Z27 | 5e-09       | 8.33e-06    | 0.000230541 | 0.001819736 | 0.005723206 | 0.000116987 | 0.000713993 | 0.01218802  |
| Z26 | 5.06e-09    | 5.01e-09    | 8.09e-09    | 5.62e-09    |             | 8.65e-09    | 7.17e-09    | 0.05220589  |
| Z25 | 7.74e-09    | 9.41e-09    | 0.03498288  | 0.03427657  | 0.05230095  | 0.0503965   | 0.01206784  | 6.53e-09    |
| Z23 | 9.24e-09    | 9.54e-09    | 0.001559636 | 0.003912979 | 0.000702686 | 5.17e-09    | 9.35e-09    | 0.03527738  |
| Z22 | 6.83e-09    | 6.15e-09    | 6.15e-09    | 8.53e-09    | 7.26e-09    | 5.93e-09    | 2.92e-05    | 0.03177485  |
| Z21 | 0.001259327 | 0.004231719 | 0.00276198  | 0.001322034 | 0.002959127 | 0.00128815  | 0.001090796 | 0.05522961  |
| Z20 | 0.000190927 | 7.29e-09    | 9.13e-09    | 0.000451381 | 9.03e-09    | 0.000856558 | 0.03991202  | 0.001301217 |
| Z2  | 0.001250614 | 6.48e-09    | 8.73e-09    | 7.65e-09    | 9.52e-09    | 5.13e-09    | 7.51e-09    | 0.0509918   |
| Z19 | 8.92e-09    | 9.68e-09    | 8.67e-09    | 8.52e-09    | 9.79e-09    | 9.91e-09    | 0.00072506  | 0.04094556  |
| Z18 | 6.43e-09    | 0.001351632 | 0.000170463 | 9.84e-09    | 9.2e-09     | 0.000876434 | 8.09e-09    | 0.04350249  |
| Z17 | 0.00128328  | 5.18e-09    | 0.4843004   | 0.5203607   | 0.4988841   | 0.4689066   | 0.4889387   | 0.508121    |
| Z16 | 7.8e-09     | 8.34e-09    | 0.01770709  | 0.08002969  | 0.07723543  | 0.03353736  | 0.07407176  | 0.07324807  |
| Z15 | 9.36e-09    | 9.81e-09    | 5.78e-09    | 6.57e-09    | 8.35e-09    | 7.1e-09     | 5.02e-09    | 0.01093719  |
| Z14 | 9.1e-09     | 0.00015543  | 0.000710821 | 0.00320945  | 0.002705785 | 0.003585673 | 0.000659049 | 0.04135883  |
| Z13 | 8.56e-09    | 6.09e-09    | 5.62e-09    | 5.9e-09     | 6.66e-09    | 0.000159021 | 0.001102061 | 0.02903403  |
| Z11 | 0.000330638 | 3.56e-05    | 8.87e-09    | 8.67e-09    | 0.0015632   | 0.001331384 | 0.001300373 | 0.04806598  |
| Z10 | 6.04e-09    | 0.001202865 | 0.000898961 | 6.35e-09    | 0.000842726 | 6.41e-09    | 0.00084359  | 0.05305366  |
