# Supplementary material
Source: publisher figshare collection journal article supplement (https://plos.figshare.com/articles/dataset/_/6271976)

Embryonic pSNMs globally present in all the sequenced organs

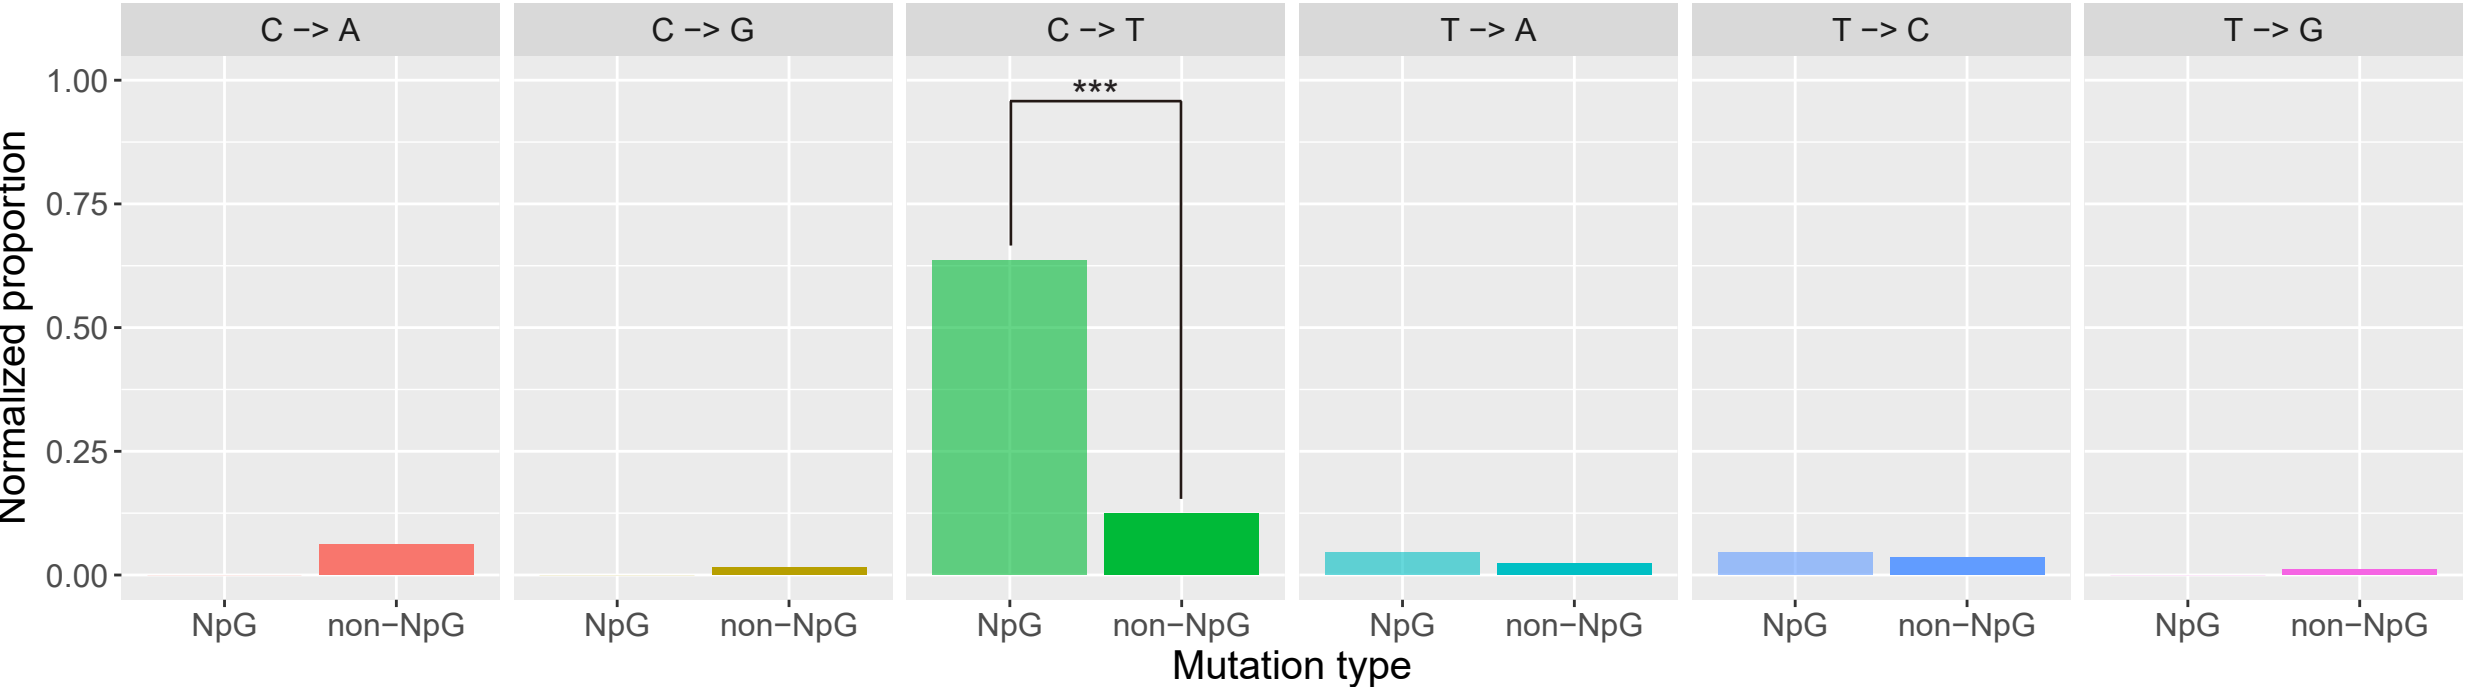

Embryonic pSNMs present in some but not all the sequenced organs

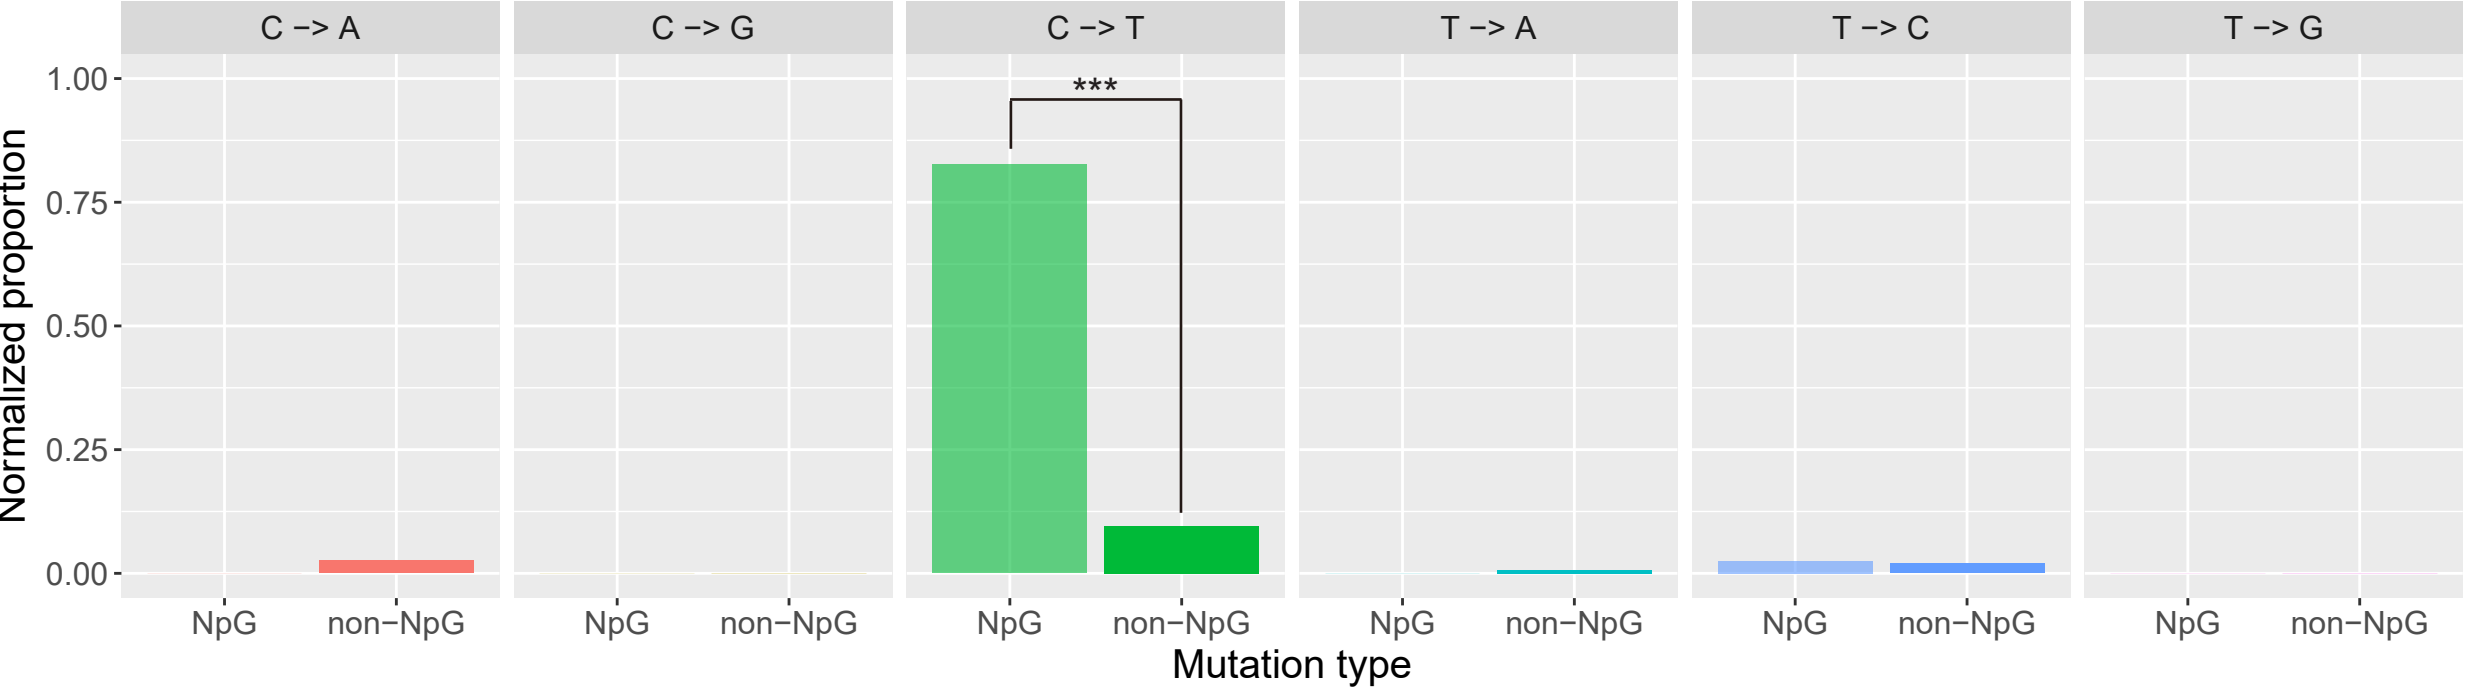

Supplement: Supplementary file 1 [file 1 › pgen.1007395.s014.pdf]
