# Supplementary material
Source: publisher figshare collection journal article supplement (https://plos.figshare.com/articles/dataset/_/6271976)
Supplement: Supplementary file 1 [file 1 › pgen.1007395.s015.pdf]

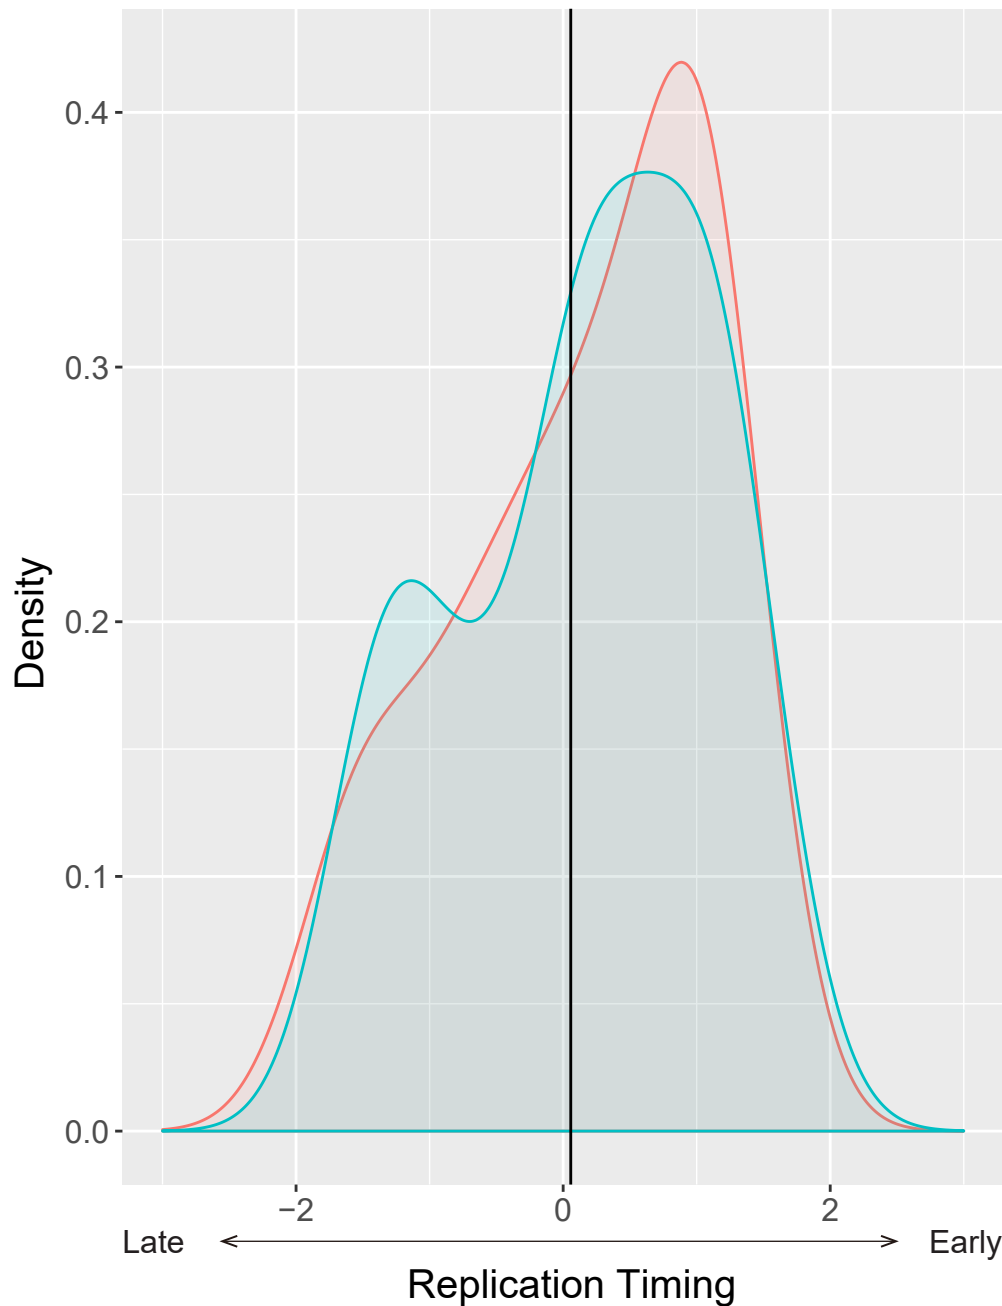

- Embryonic pSNMs globally present in all the sequenced organs
- Embryonic pSNMs present in some but not all the sequenced organs
