# Supplementary material
Source: publisher figshare collection journal article supplement (https://plos.figshare.com/articles/dataset/_/6271976)
Supplement: Supplementary file 1 [file 1 › pgen.1007395.s017.pdf]

Minor allele fraction

0.3

0.2

0.1

0.0

b1

b5

b9

c1

c5

c9

l1

l5

l9

p1

p5

p9

s1

s5

s9

Sample ID

0.0097

0.0197

0.0109

0.0109

0.0109

0.0049

0.0023

0.0029

0.0041

0.0095

0.0034

0.0075

0.0042

0.0098

0.0123

0.0083

0.0125

stdev(brain)=0.0281

stdev(colon)=0.0243

stdev(liver)=0.0086

stdev(prostate)=0.0201

stdev(skin)=0.0319

stdev(all)=0.0321

Tissues

brain

colon

liver

prostate

skin
