# Supplementary material
Source: publisher figshare collection journal article supplement (https://plos.figshare.com/articles/dataset/_/6271976)

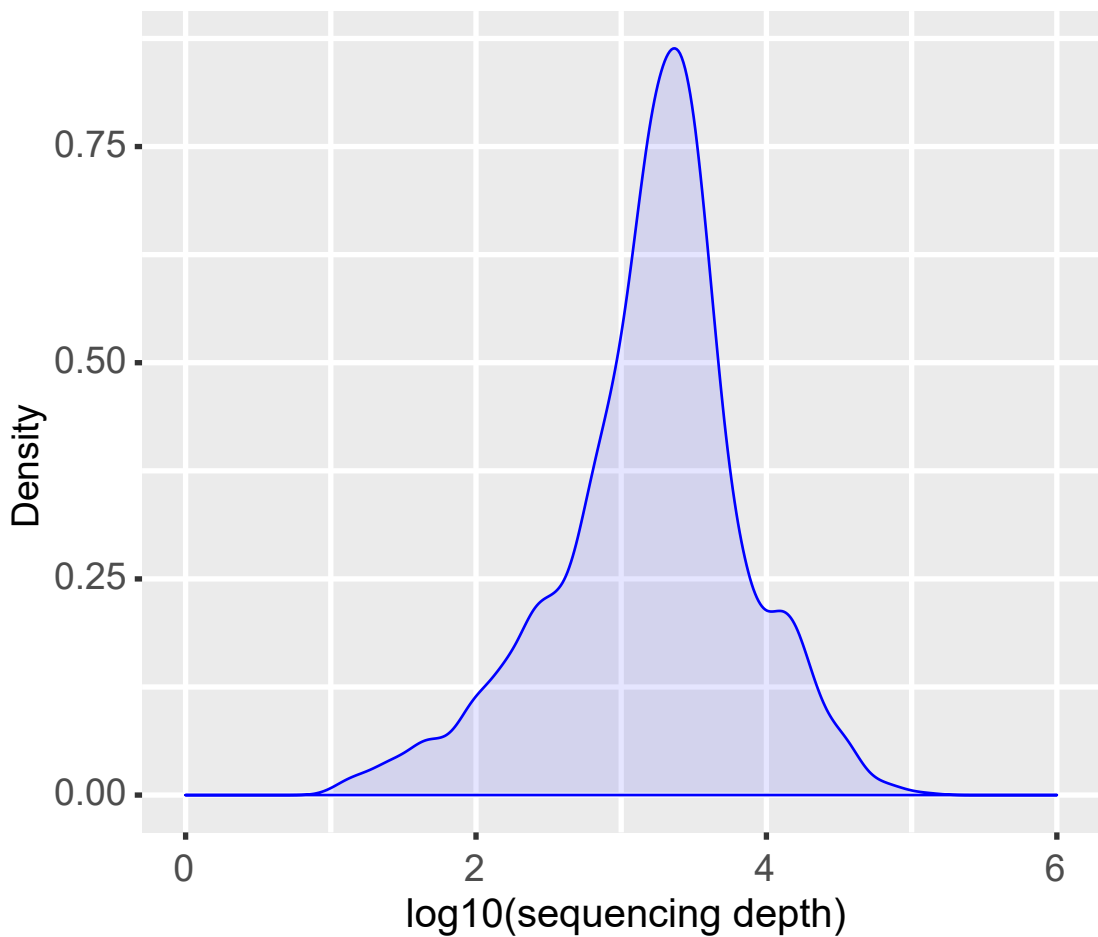

Supplement: Supplementary file 1 [file 1 › pgen.1007395.s001.pdf]

BBL1100C

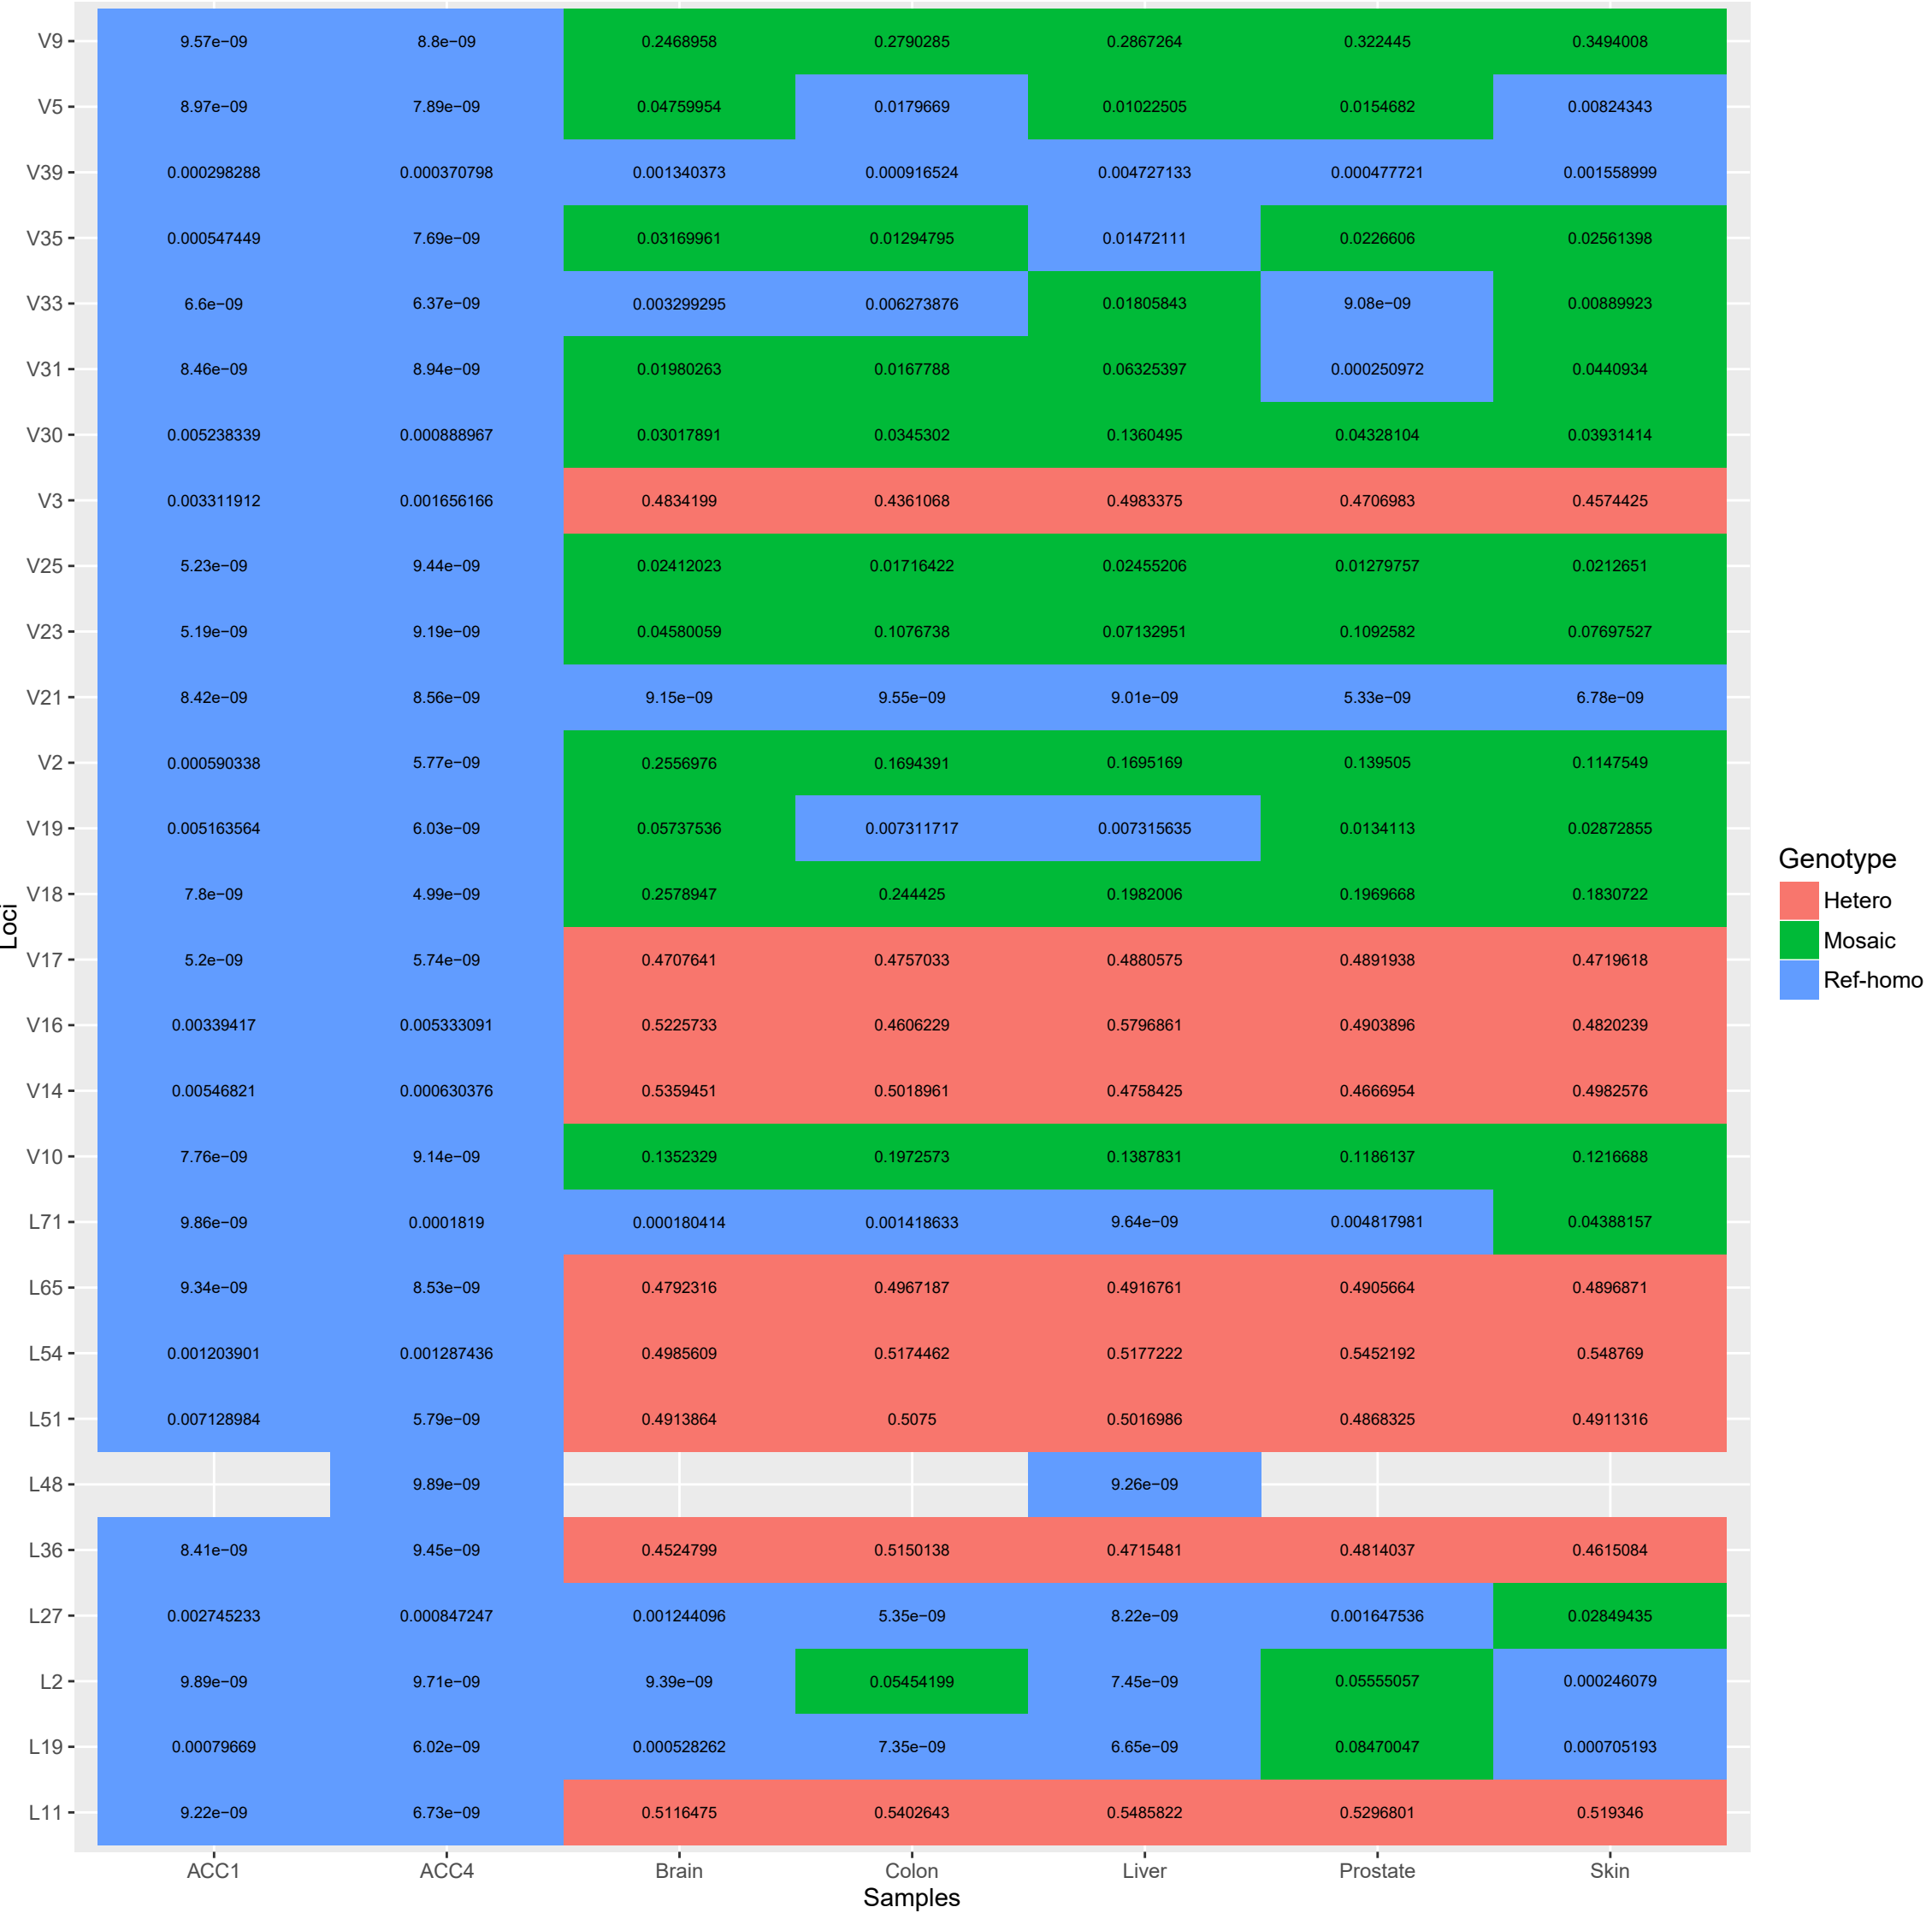

Supplement: Supplementary file 1 [file 1 › pgen.1007395.s002.pdf]

BBLC1013

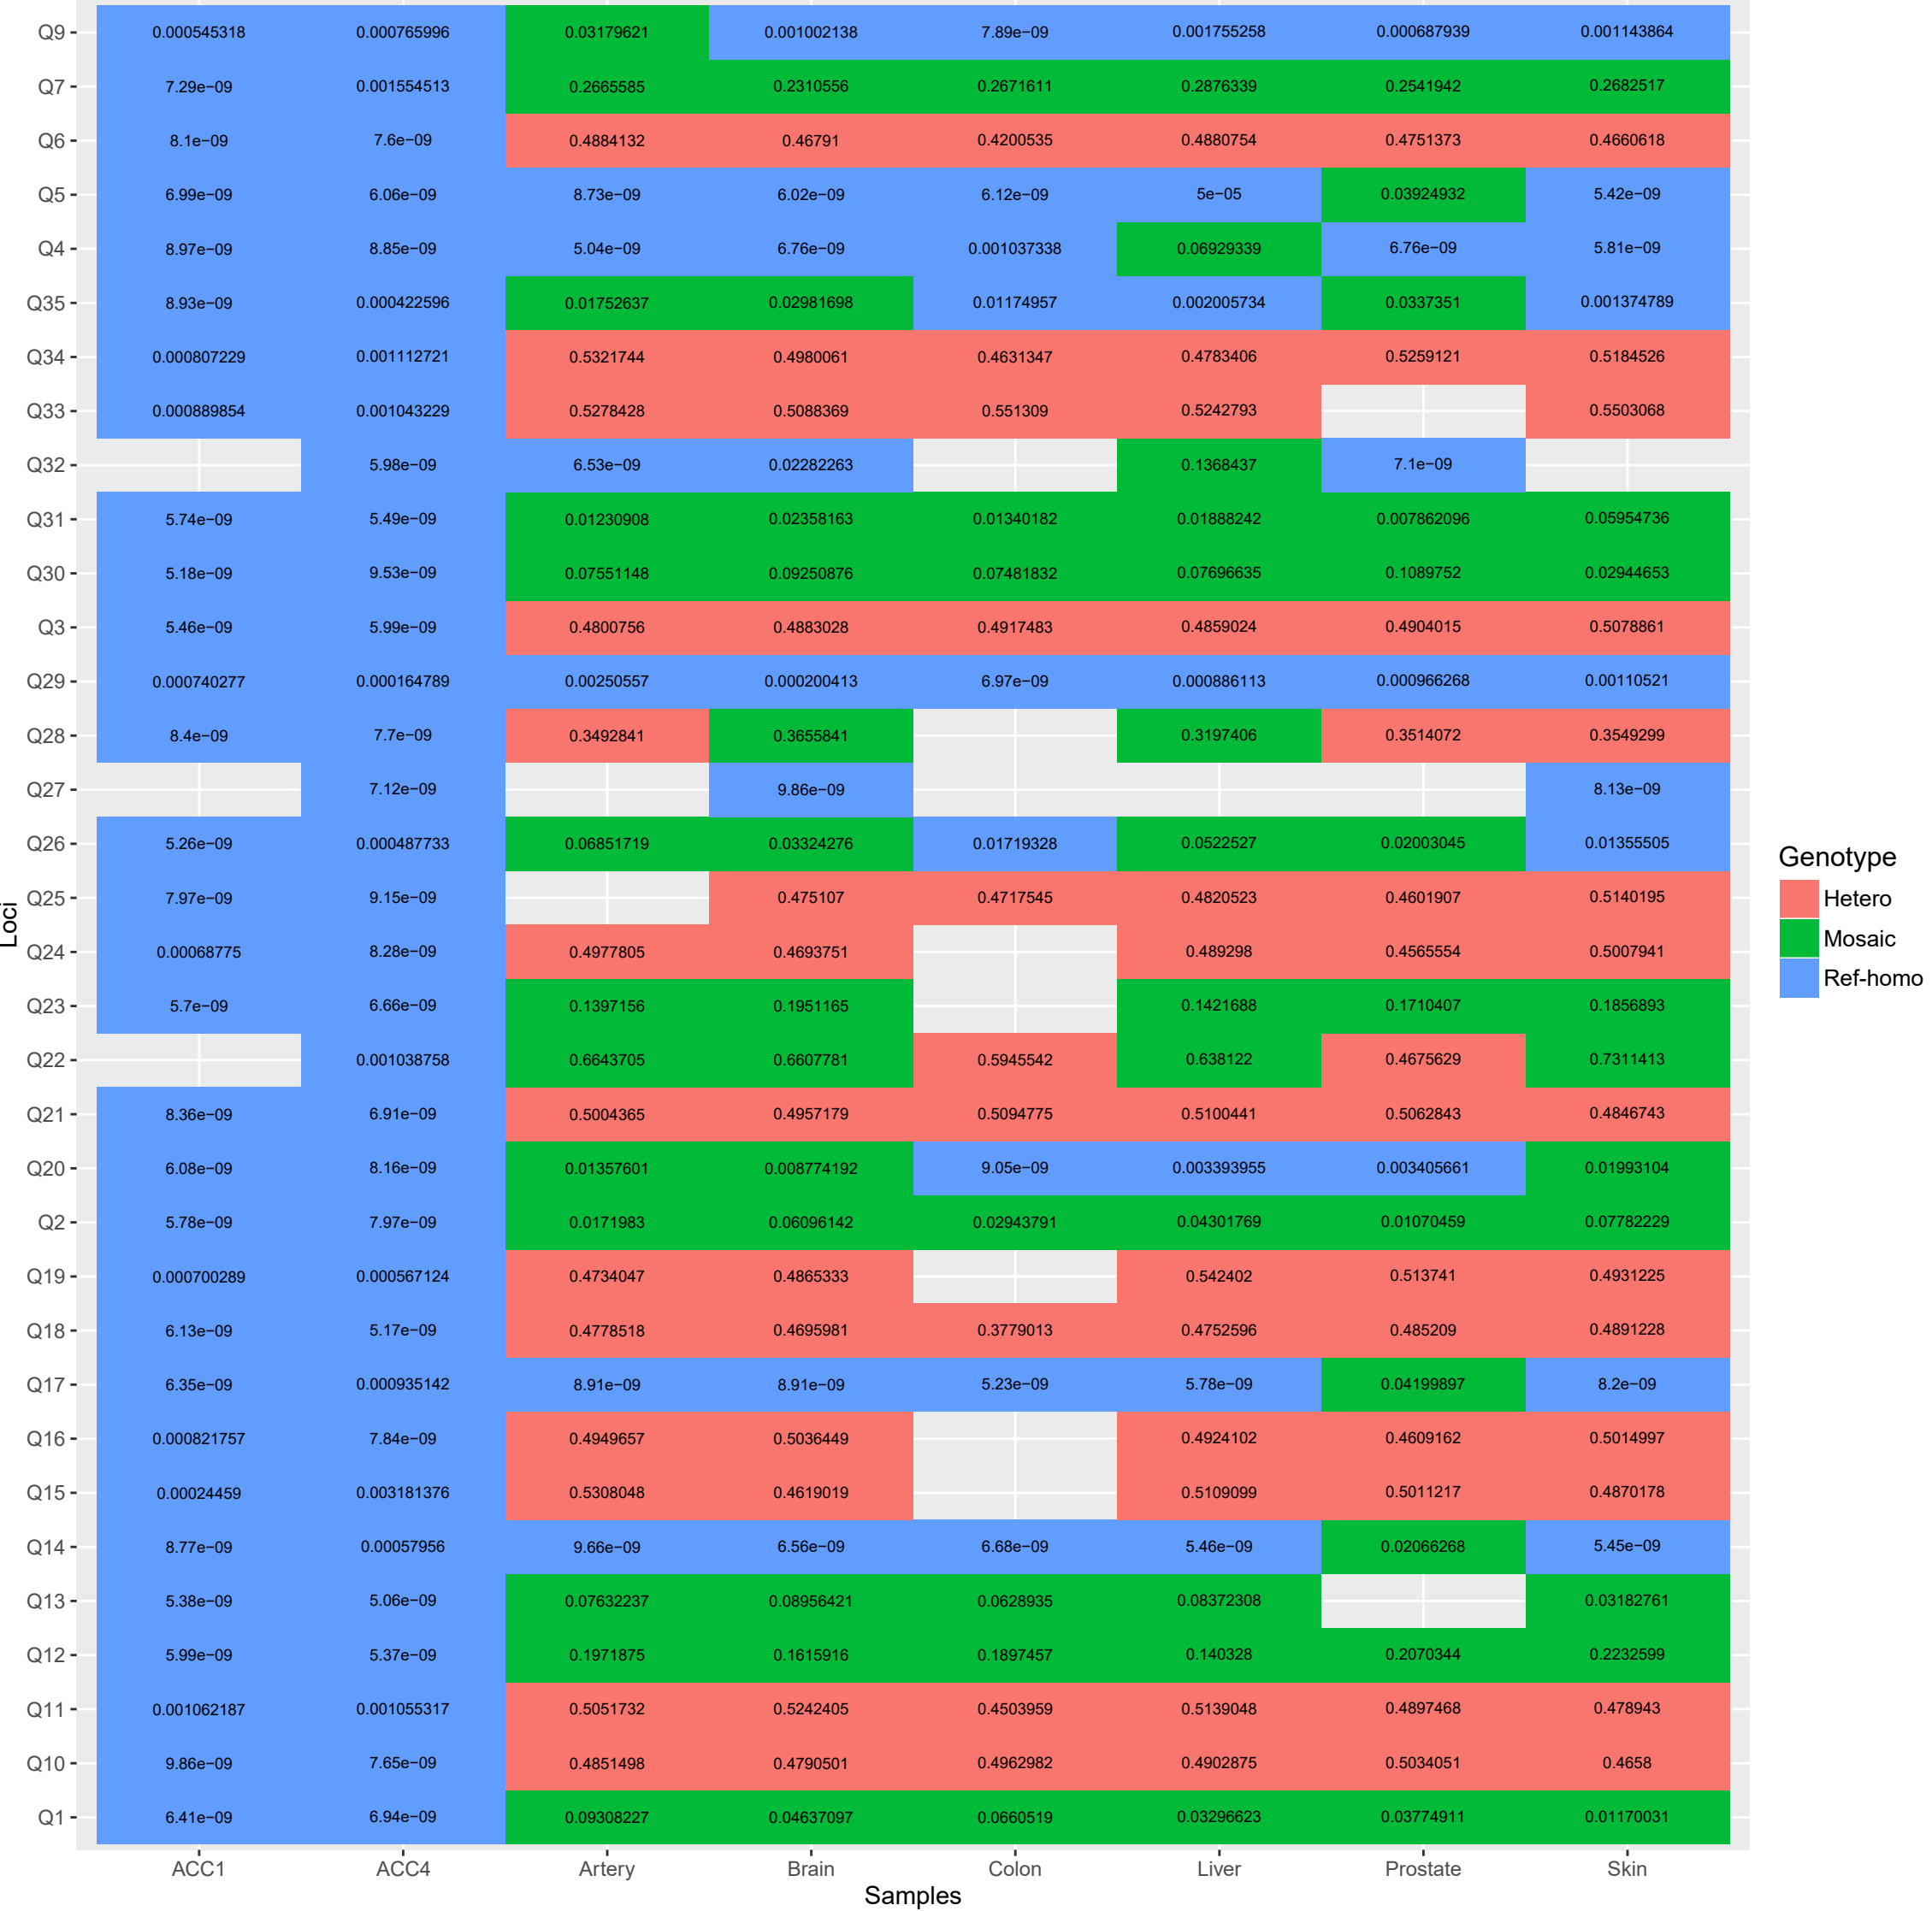

Supplement: Supplementary file 1 [file 1 › pgen.1007395.s004.pdf]

BBLD1005

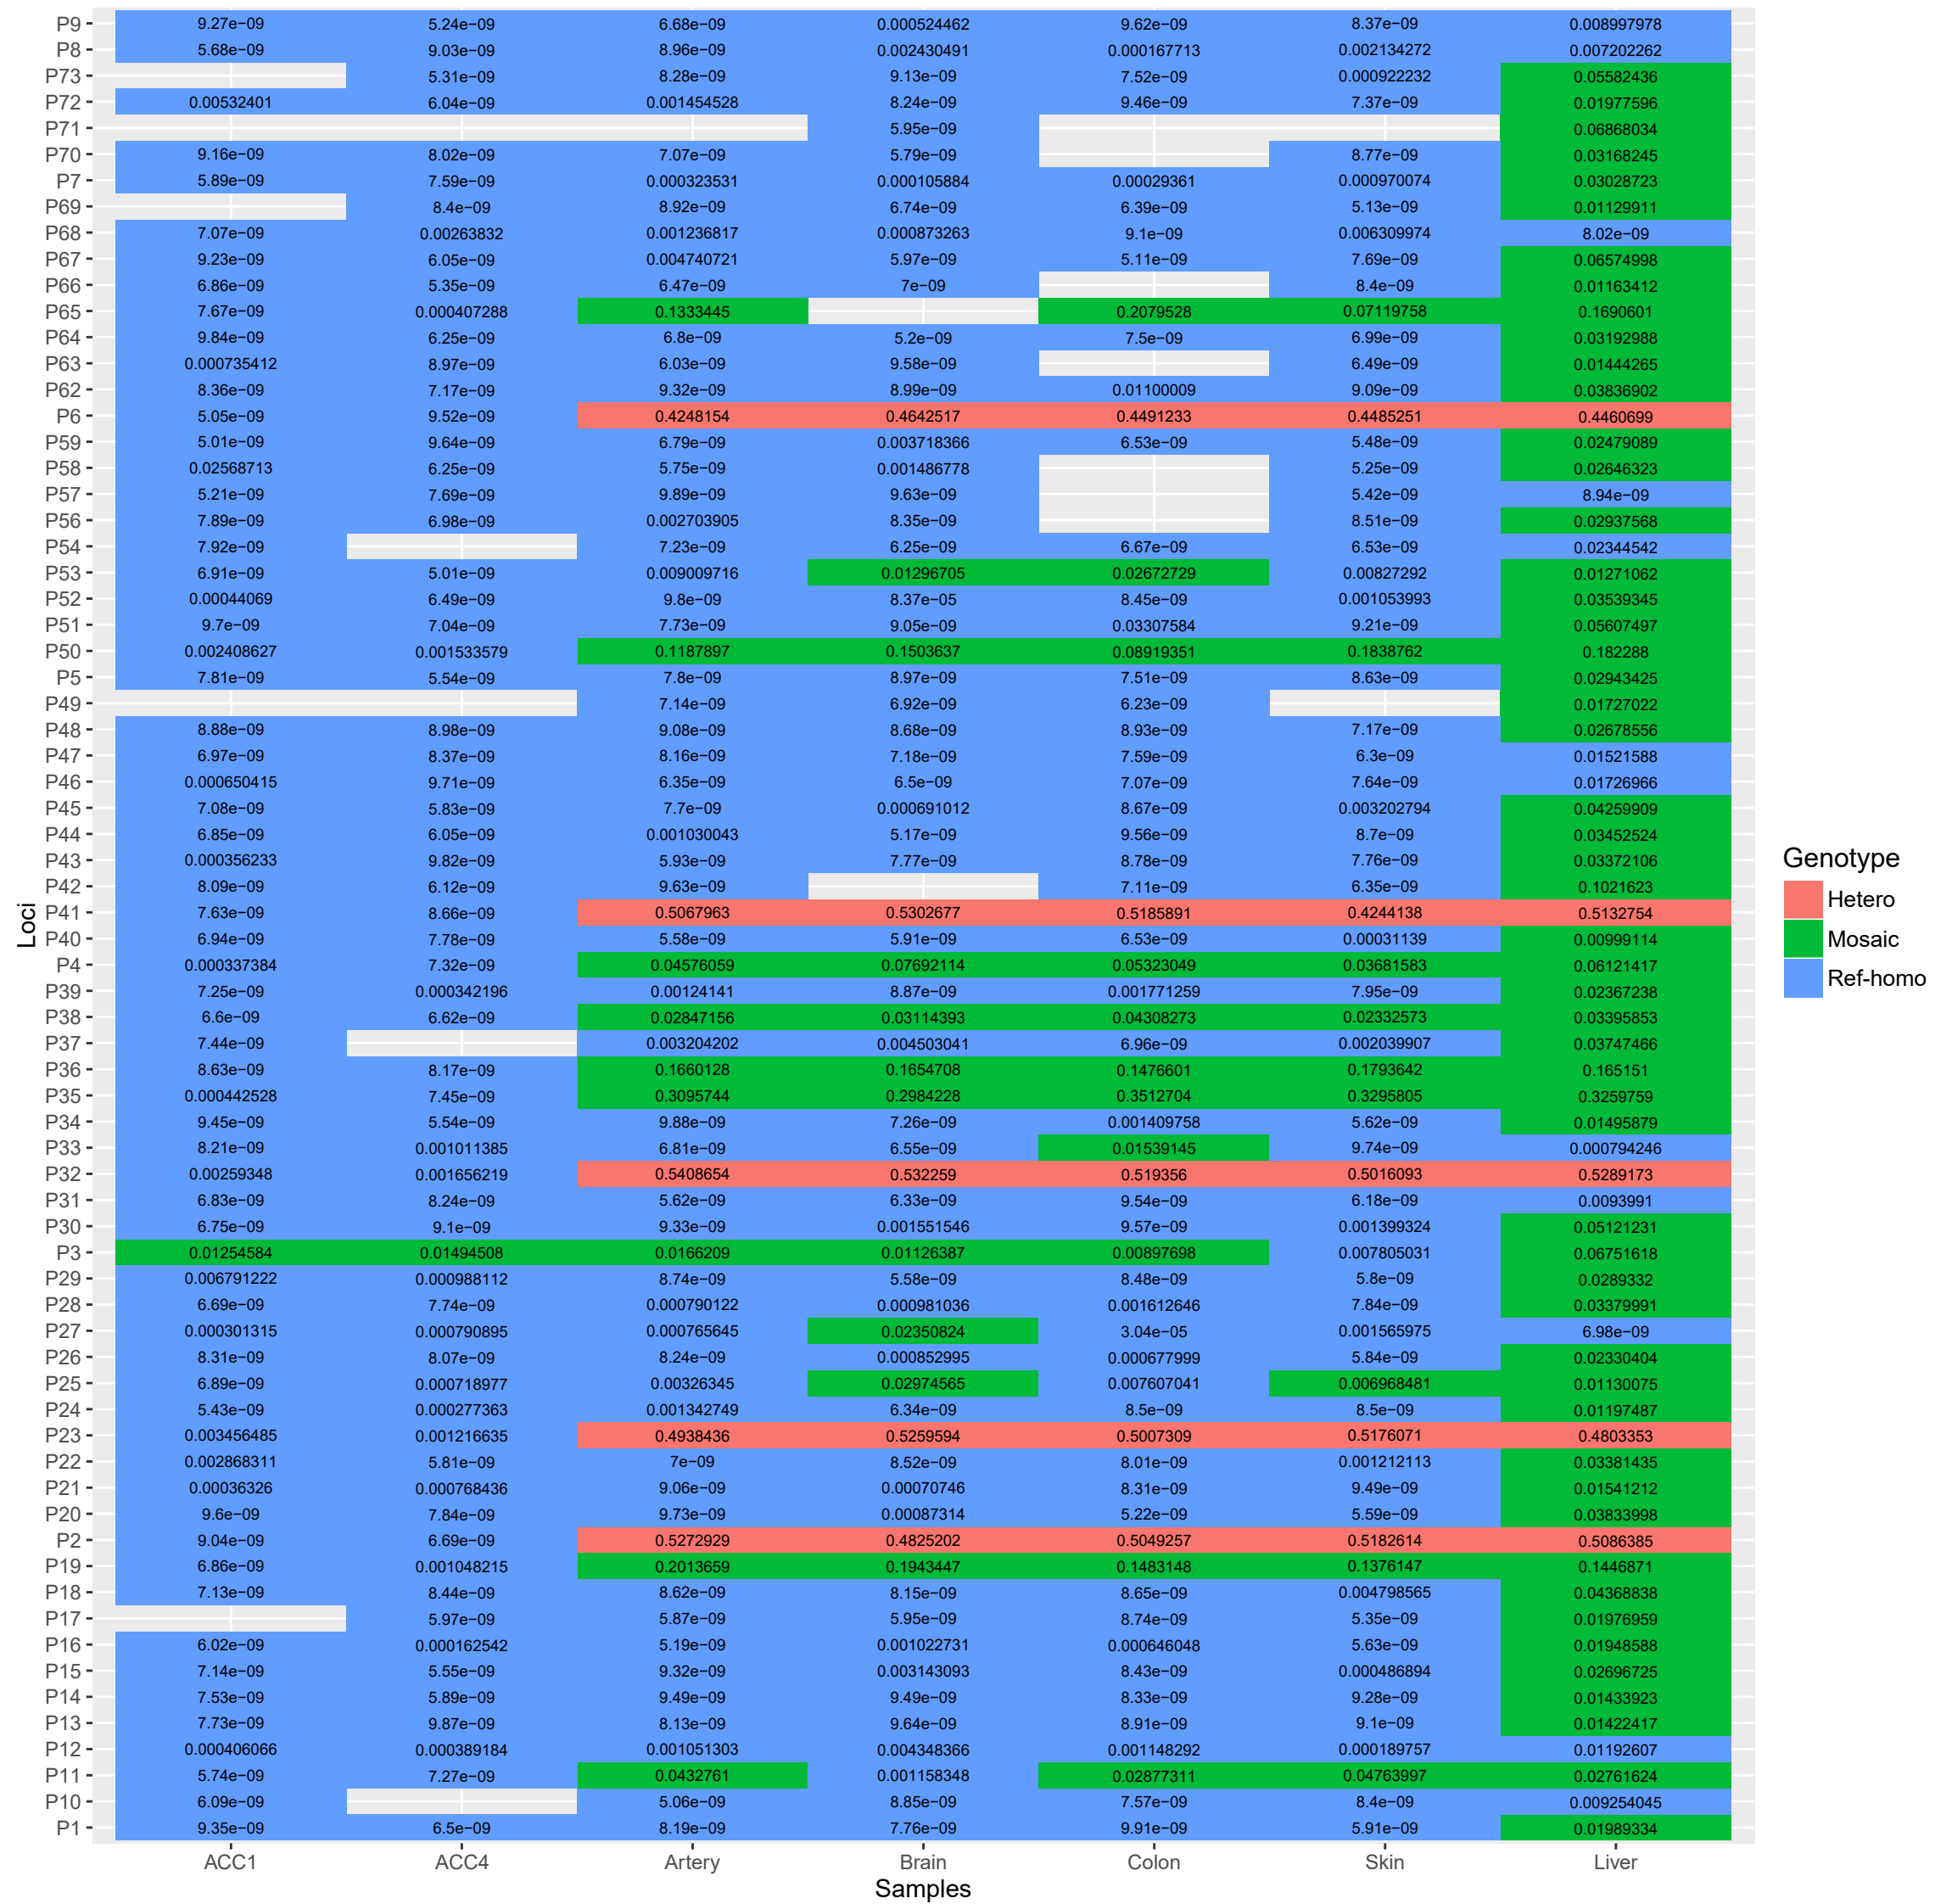

Supplement: Supplementary file 1 [file 1 › pgen.1007395.s005.pdf]

BBLD1010

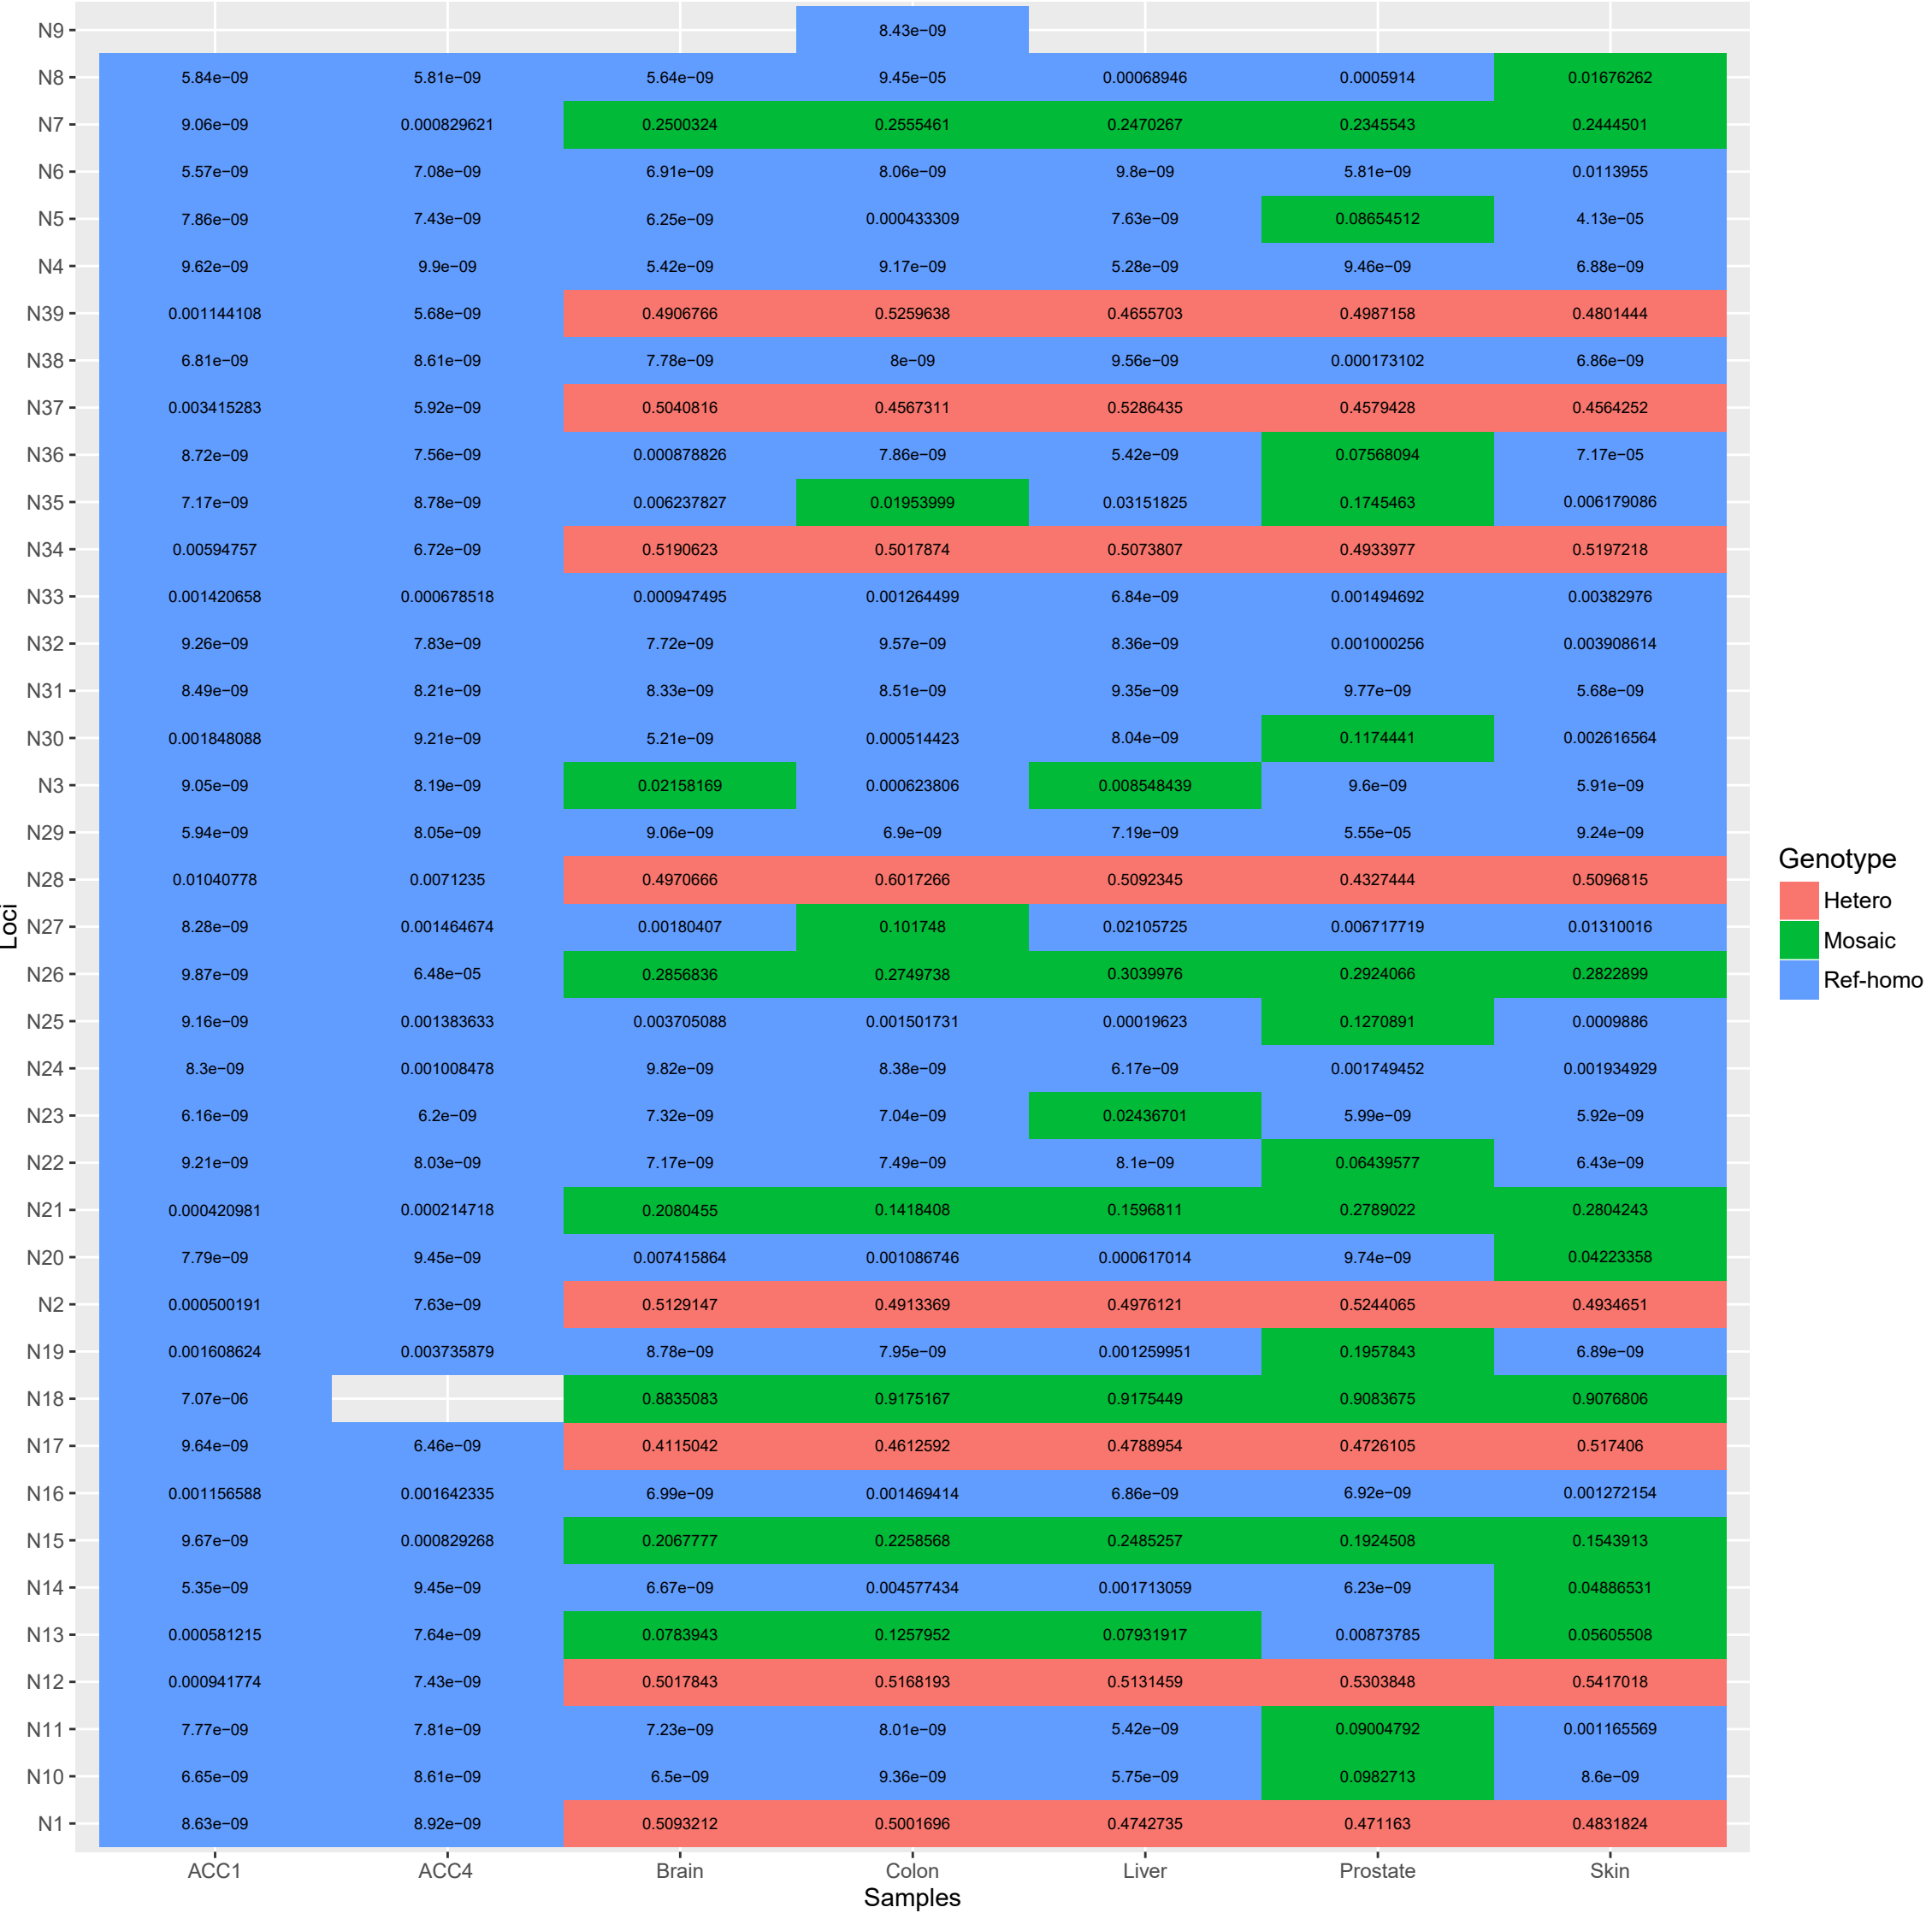

Supplement: Supplementary file 1 [file 1 › pgen.1007395.s006.pdf]

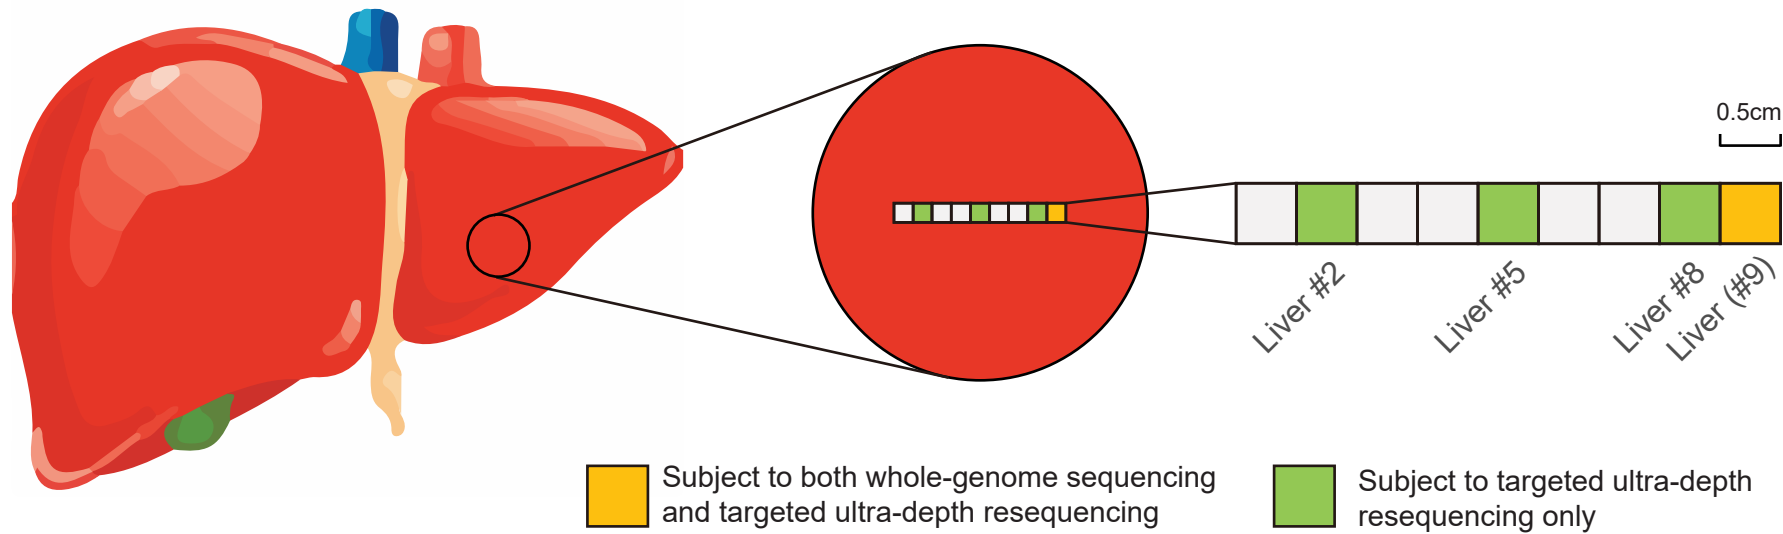

Supplement: Supplementary file 1 [file 1 › pgen.1007395.s007.pdf]

BBLD1005

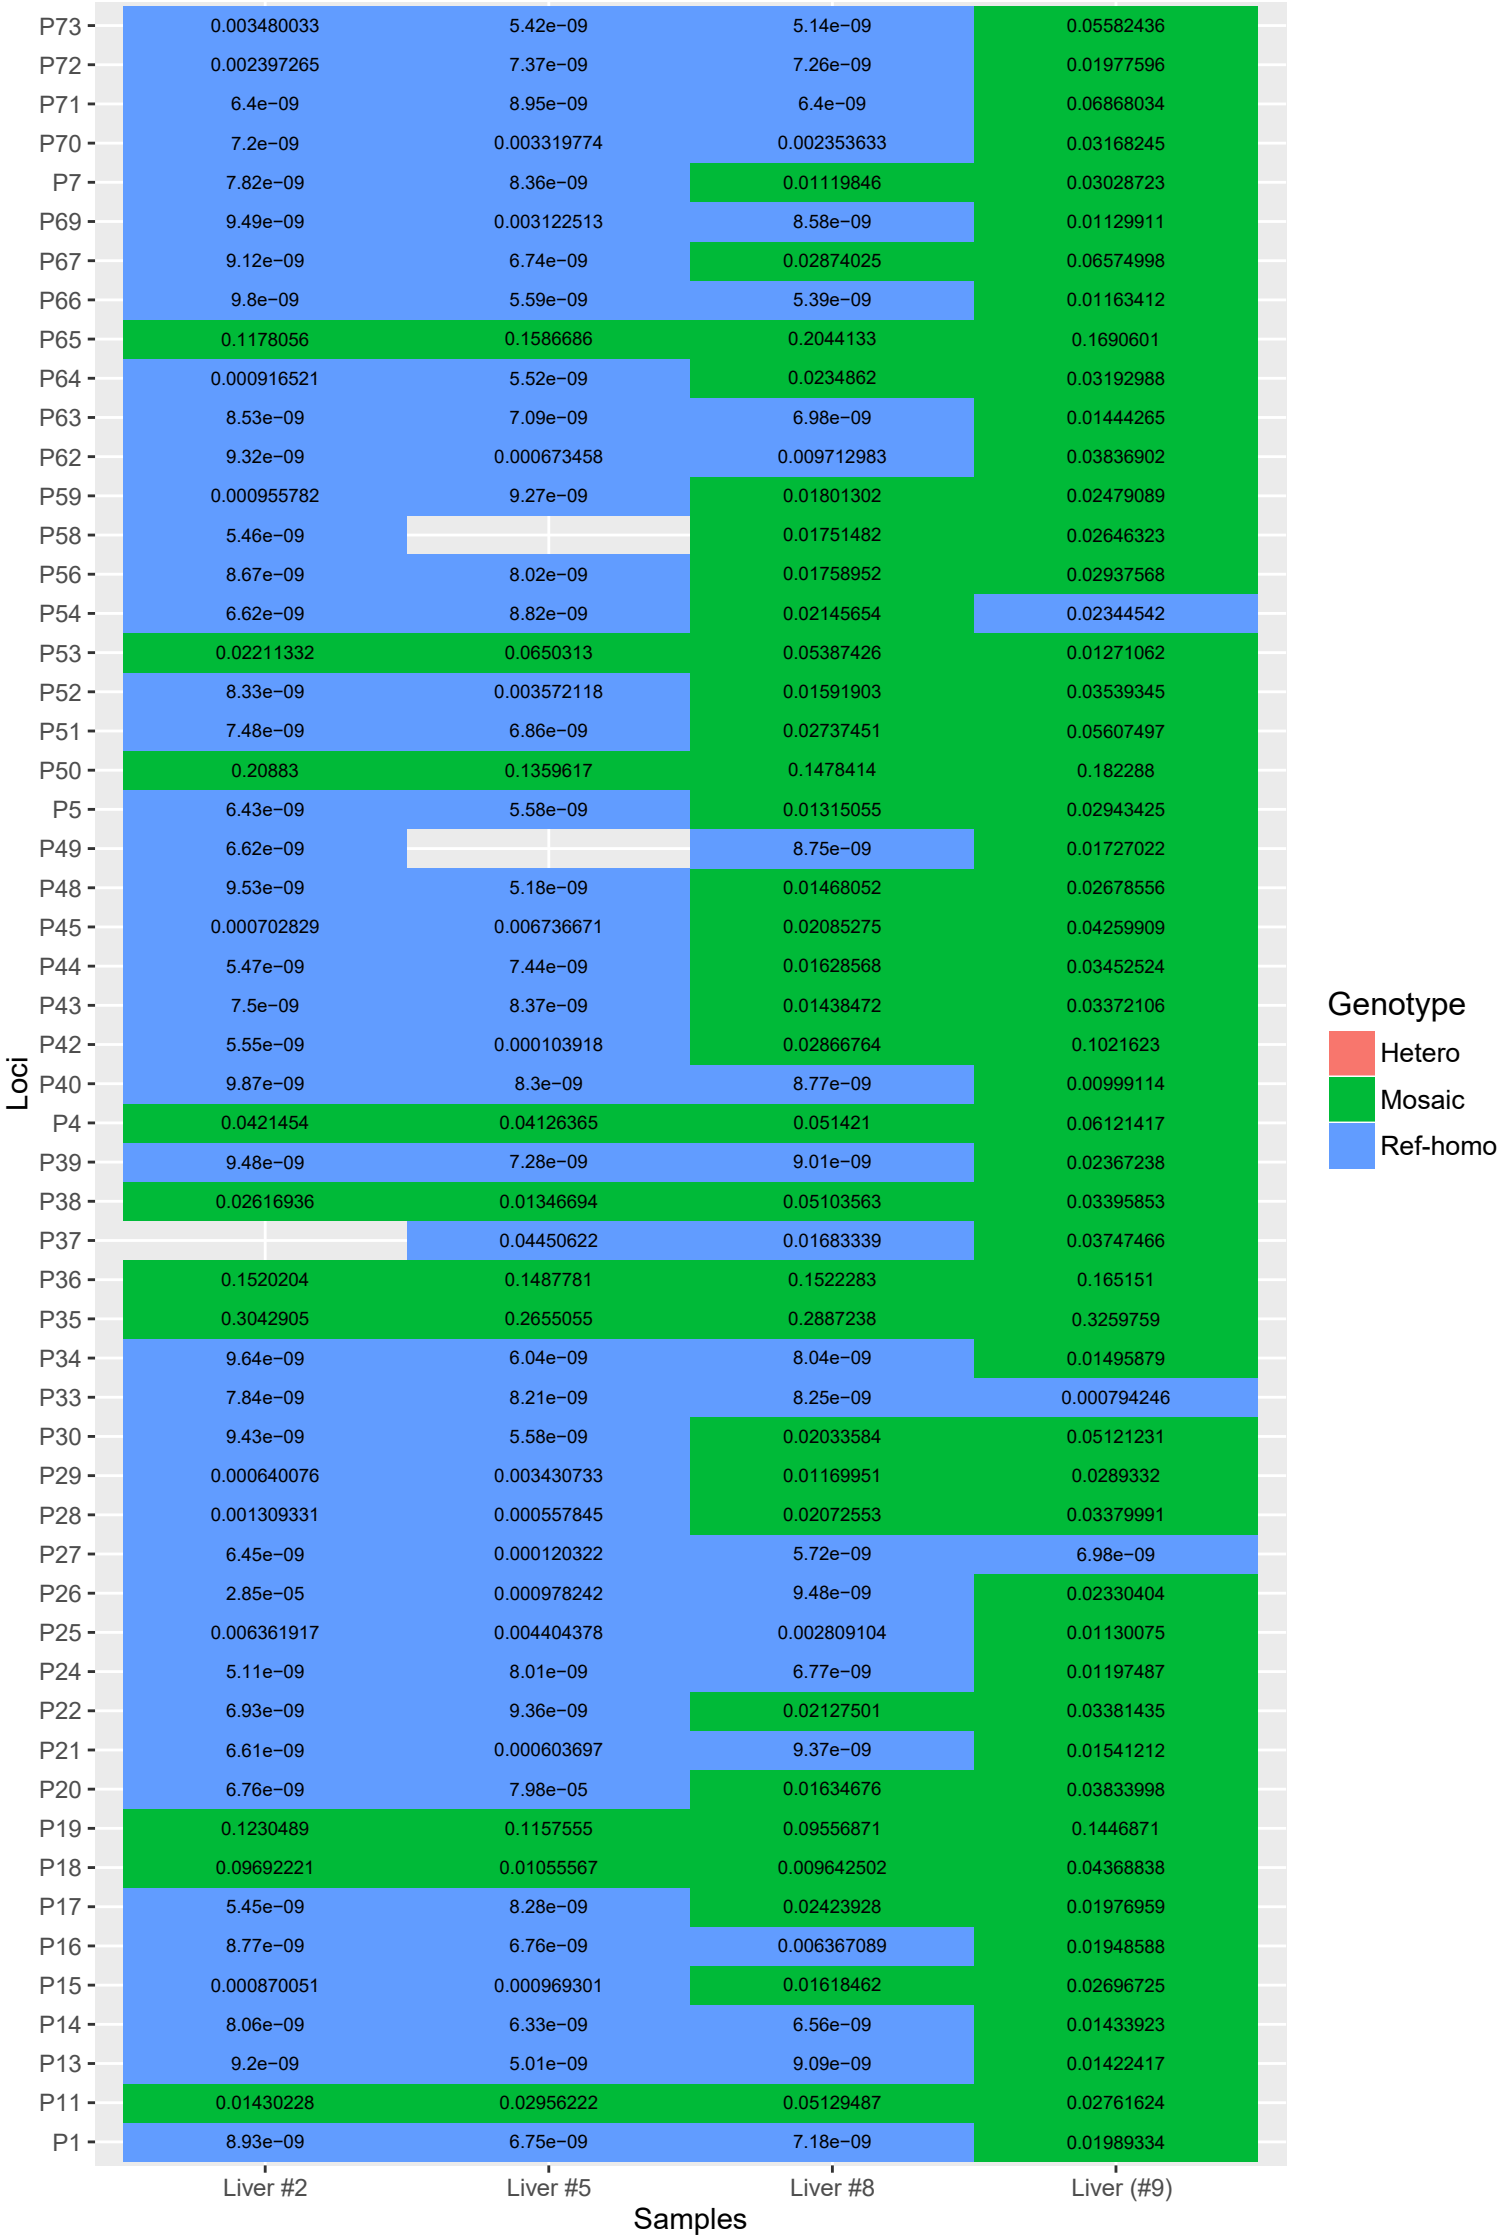

Supplement: Supplementary file 1 [file 1 › pgen.1007395.s008.pdf]

BBL11121

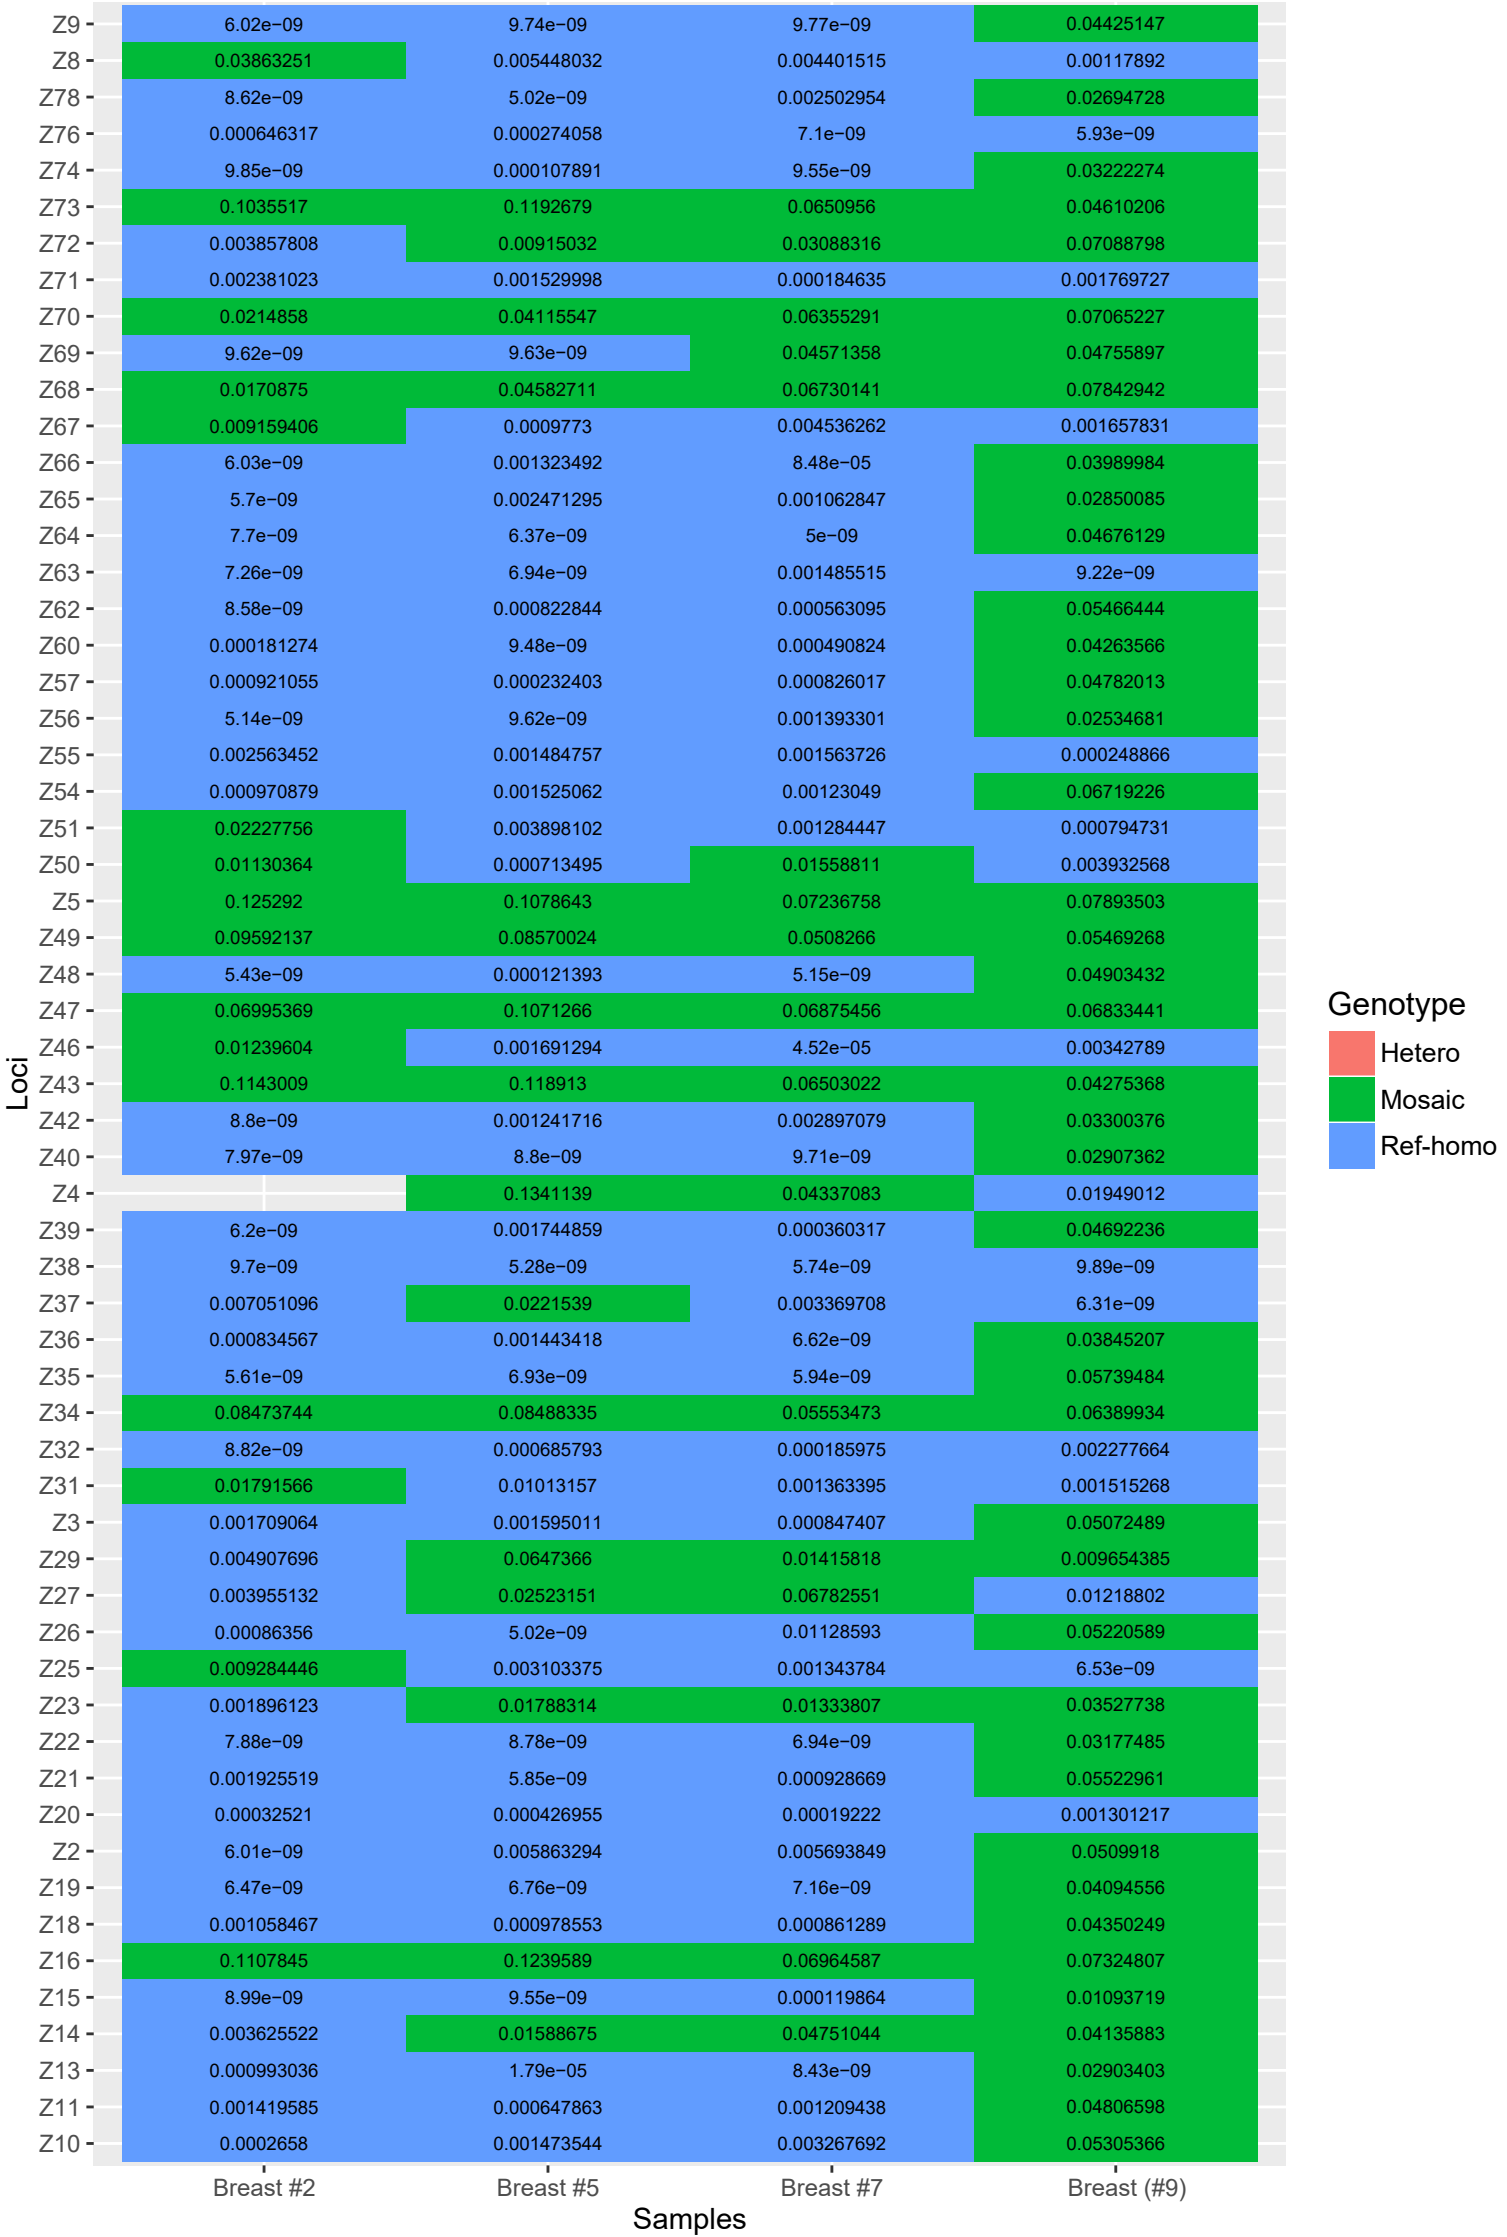

Supplement: Supplementary file 1 [file 1 › pgen.1007395.s009.pdf]

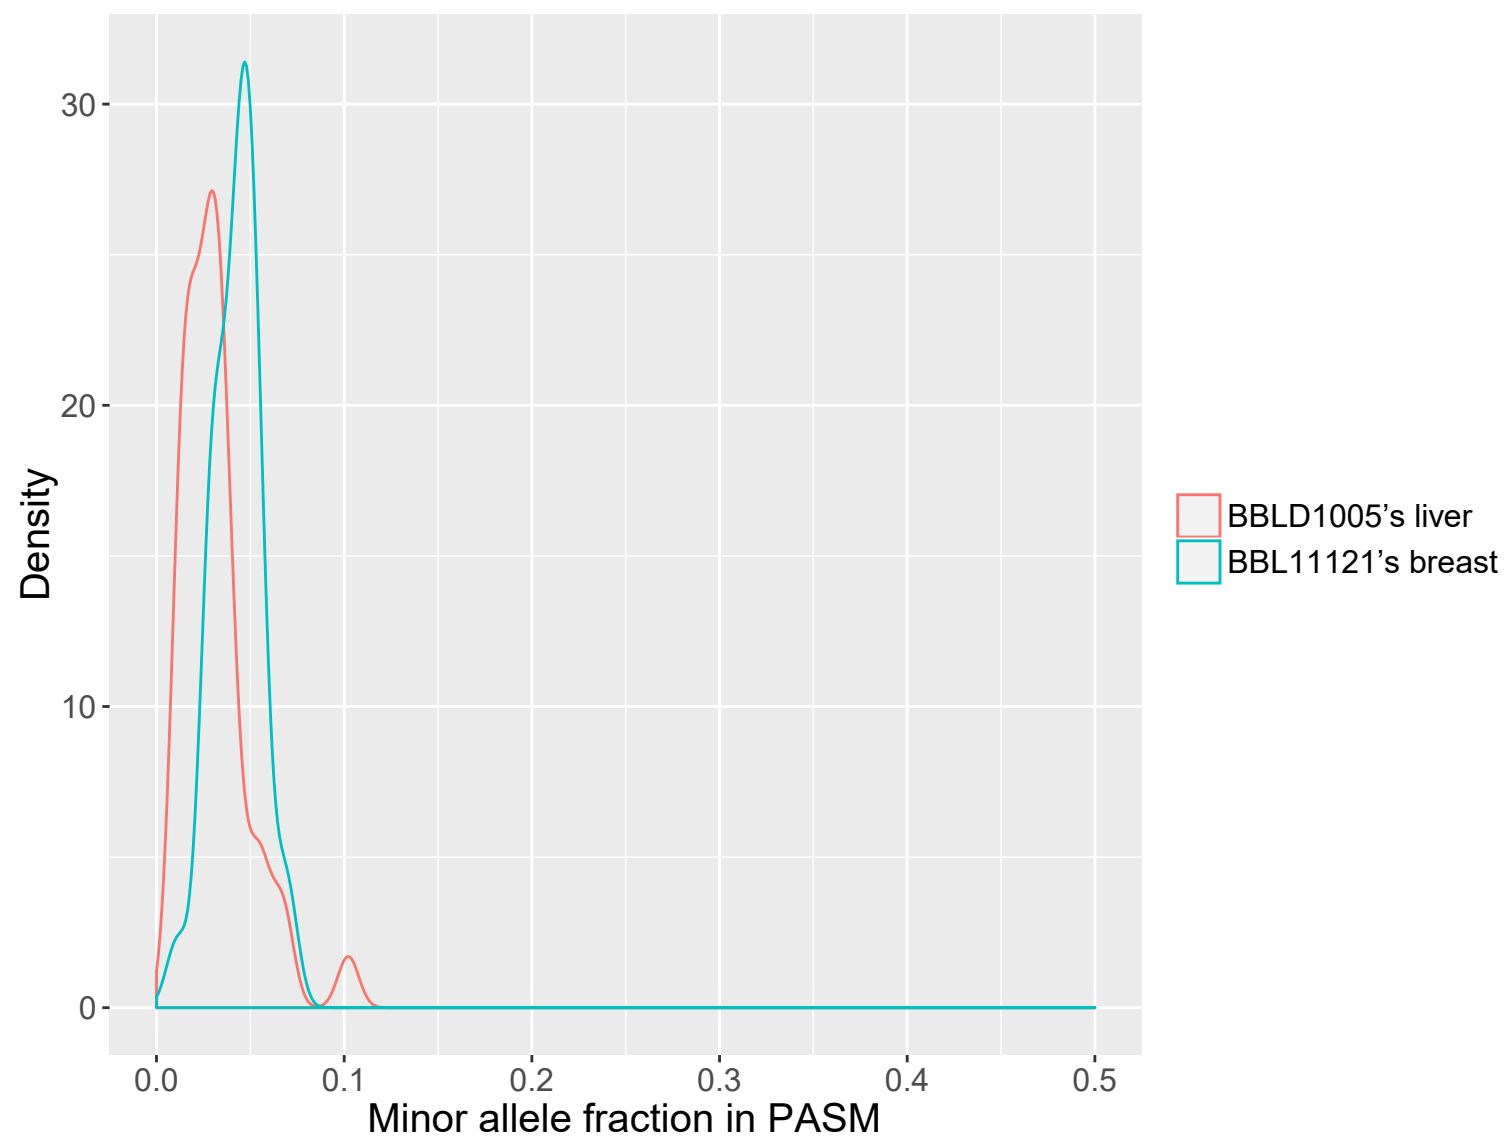

Supplement: Supplementary file 1 [file 1 › pgen.1007395.s010.pdf]

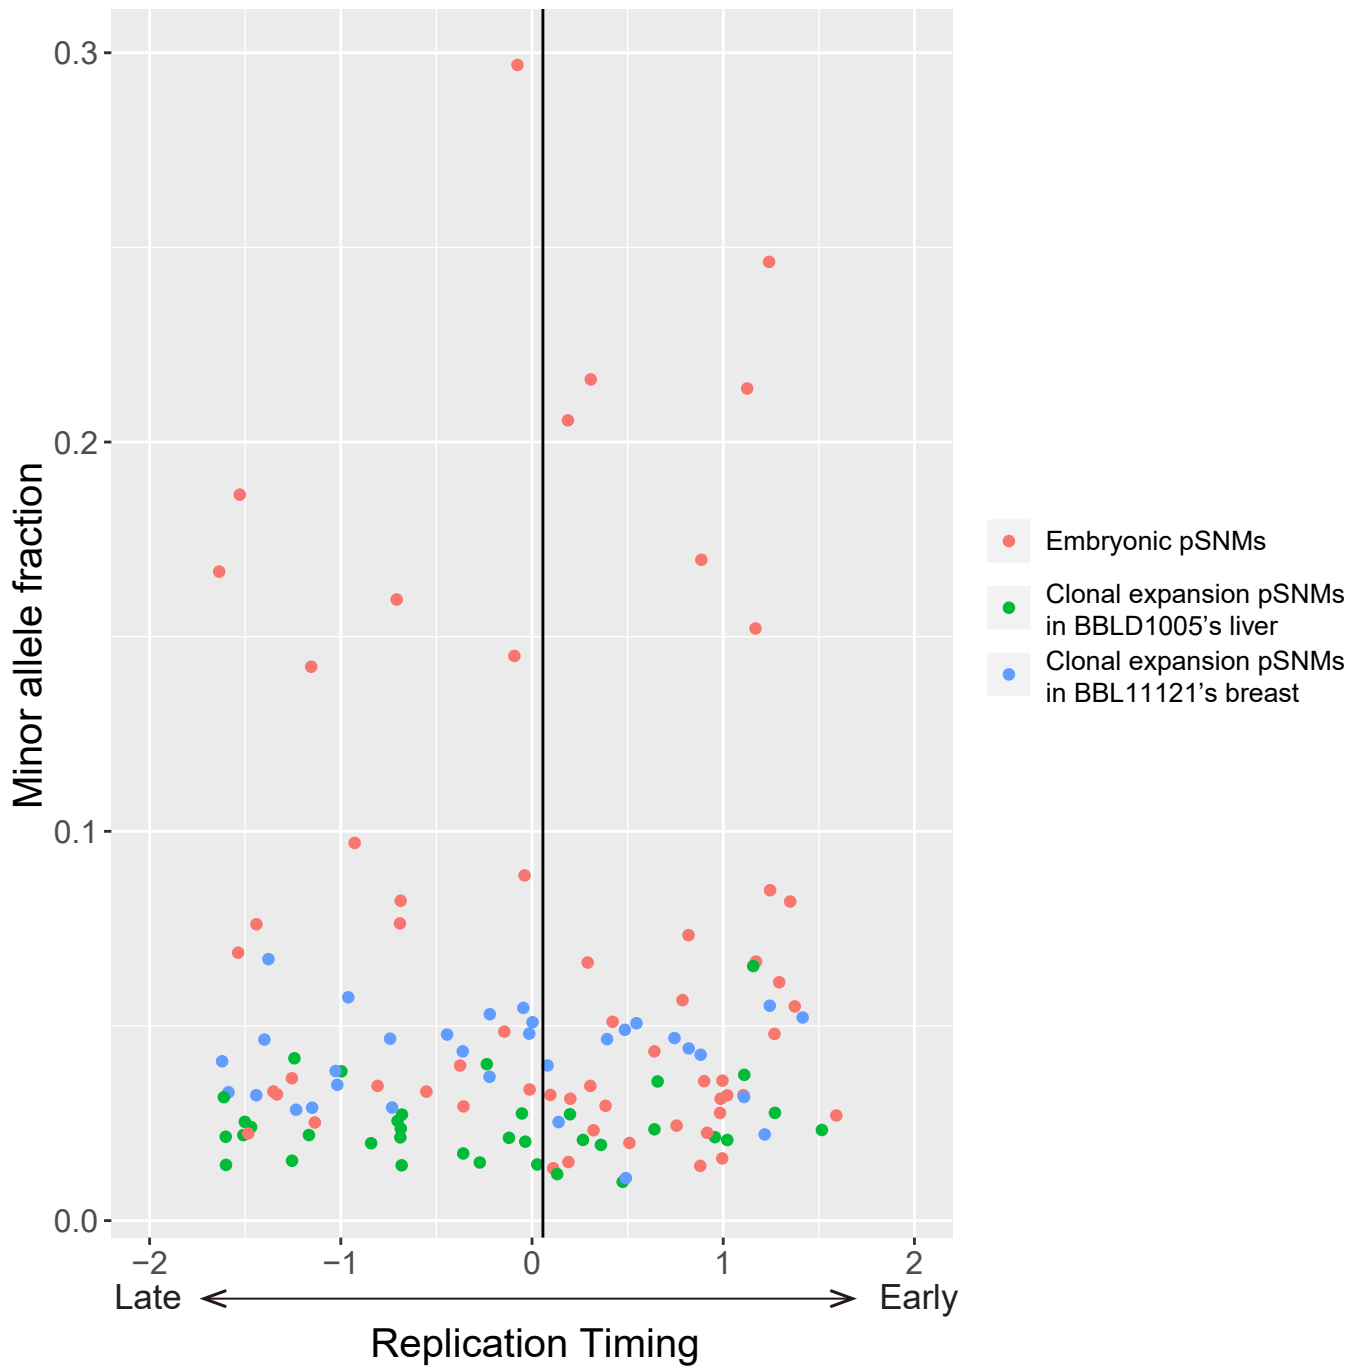

Supplement: Supplementary file 1 [file 1 › pgen.1007395.s011.pdf]

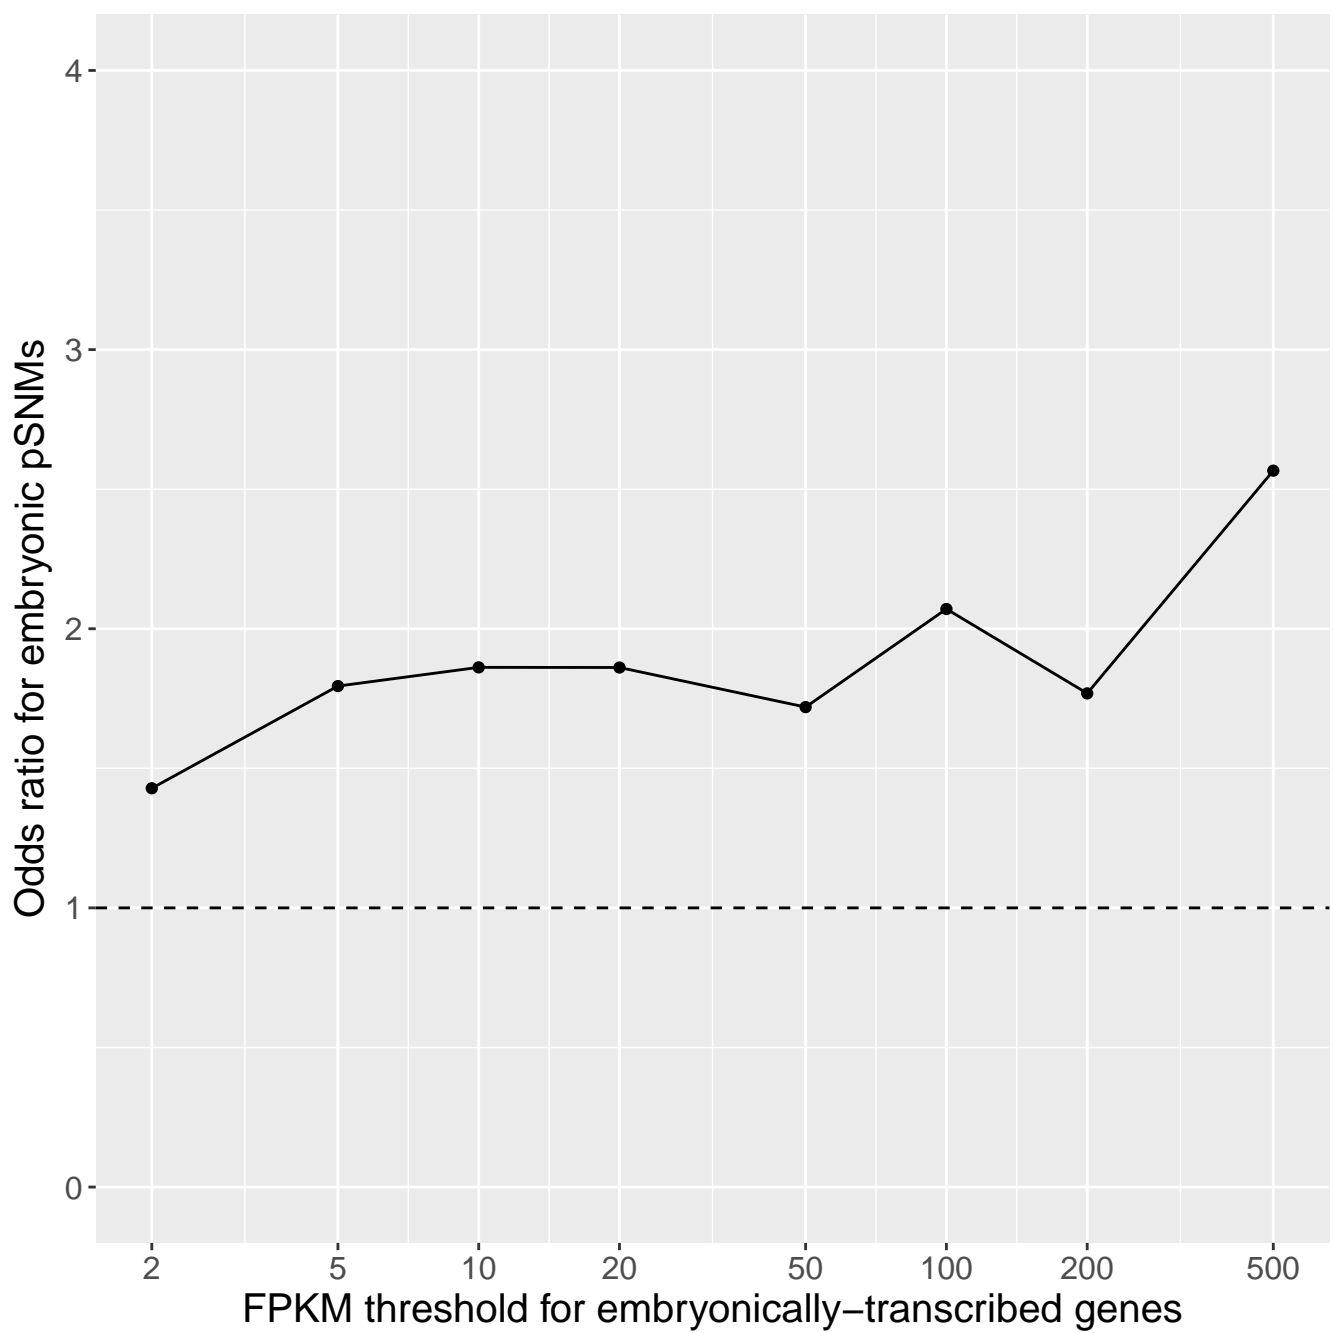

Supplement: Supplementary file 1 [file 1 › pgen.1007395.s012.pdf]

HepG2

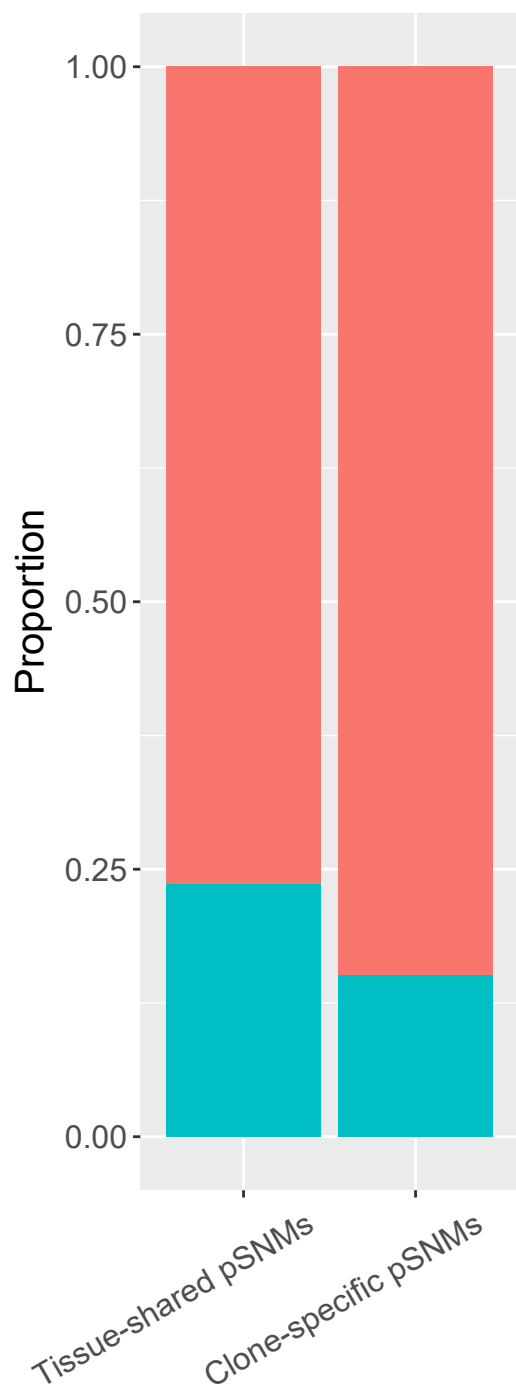

HMEC

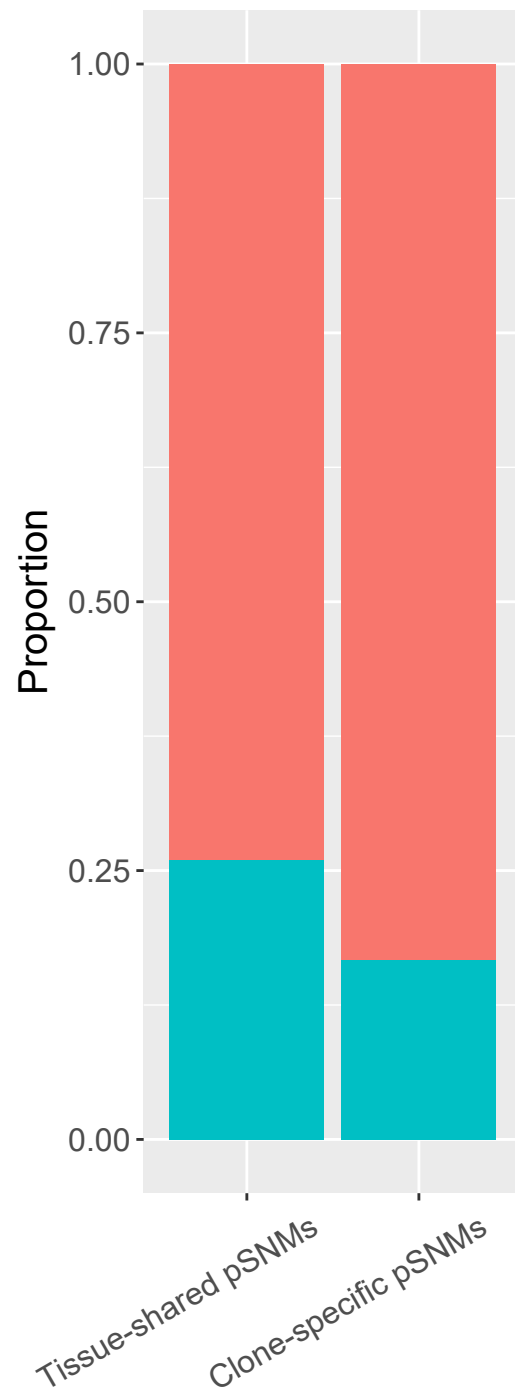

K562

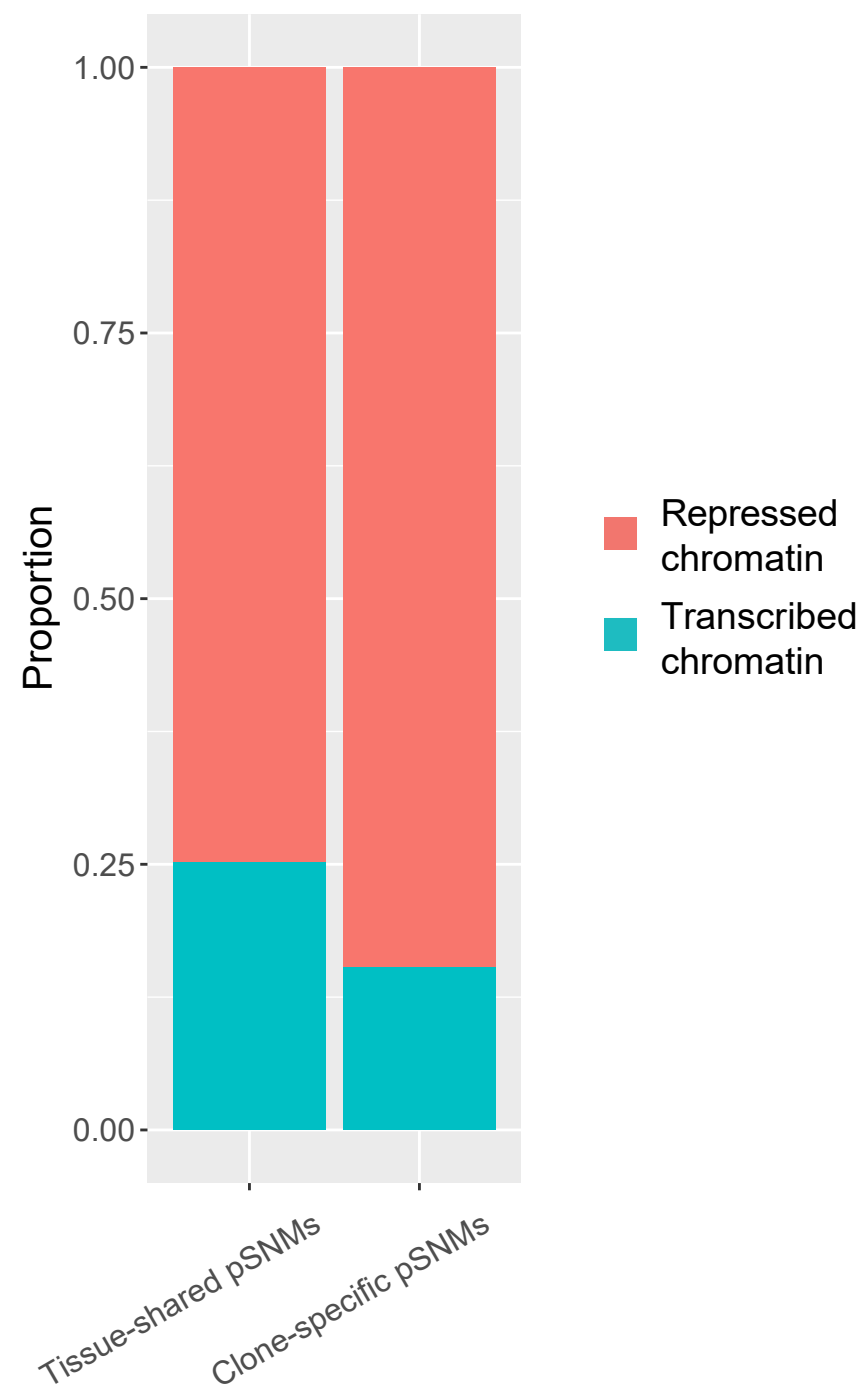

Supplement: Supplementary file 1 [file 1 › pgen.1007395.s013.pdf]

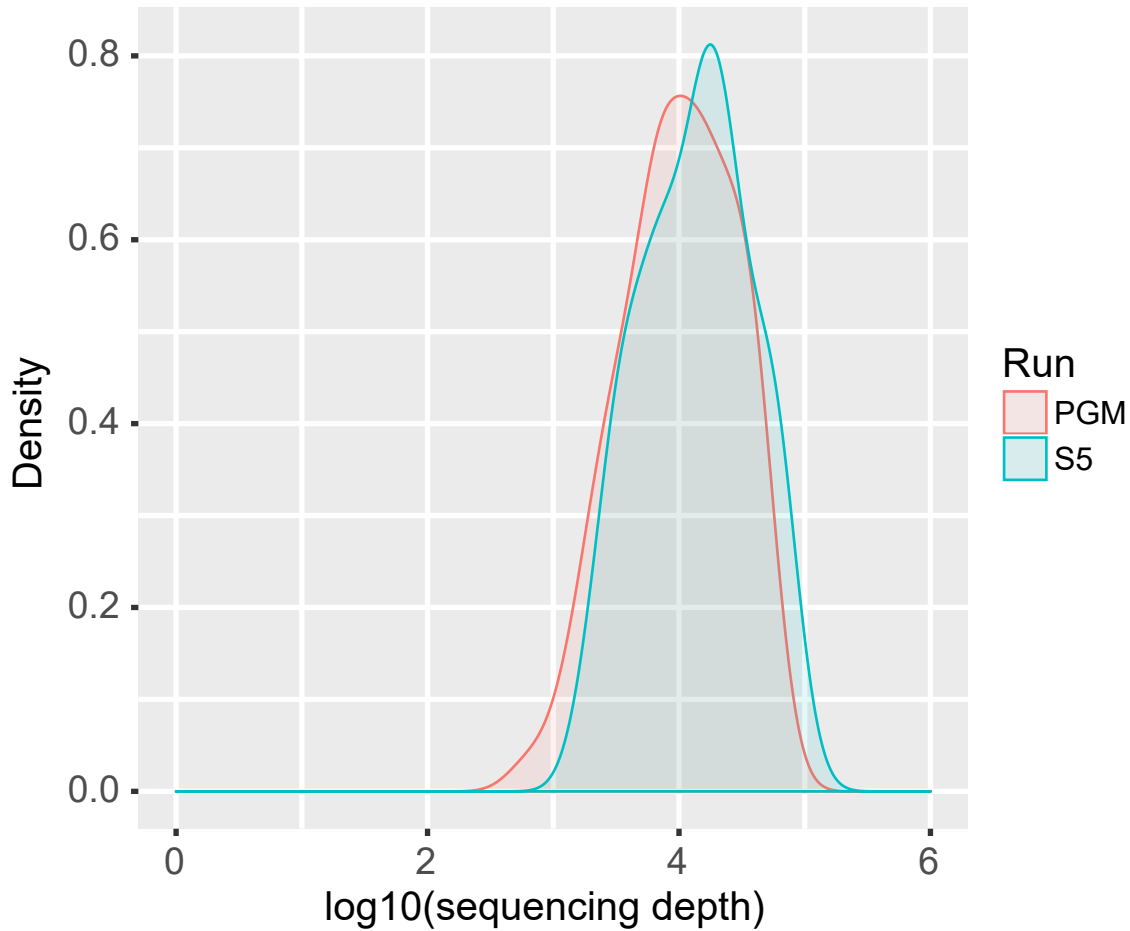

Supplement: Supplementary file 1 [file 1 › pgen.1007395.s016.pdf]
